# Supplementary material for: Low Oxygen Levels Induce Early Luteinization Associated Changes in Bovine Granulosa Cells
Source: Front Physiol. 2018 Aug 7;9:1066. doi: 10.3389/fphys.2018.01066 (PMC6090175; doi:10.3389/fphys.2018.01066)
Supplement: DATA SHEET S7 — List of upstream regulators. [file Data_Sheet_7.xlsx]

## Sheet: Sheet1
Upstream Regulator	Molecule Type	Predicted Activation State	Activation z-score	p-value of overlap	Target molecules
NUPR1	transcription regulator	Inhibited	8.531	5.09e-31	ADM/AKAP12/ALG8/ANP32A/ARHGAP11A/ASPM/ATF3/BNIP3/BRI3BP/BUB1/BUB1B/C3orf58/CCNA2/CDCA8/CDKN1B/CHTF8/CITED2/CXCR4/CYB5B/CYR61/DDIT3/ELL2/ENO2/EREG/EXO1/FAM162A/FANCD2/FLVCR1/FUT11/GADD45A/GPCPD1/HIST1H2AH/HIST1H2AJ/HIST1H2AM/HIST1H2BM/HIST1H3C/HIST2H3A/HIST2H3D/HK2/HNRNPA2B1/HNRNPM/ING2/IPP/IRF2BP2/JKAMP/KANK2/KDM3A/KIF11/KIF18A/KIF20A/KIF23/KIF2C/KLF6/KNL1/LMNB1/LRP8/MAT2A/MCM10/MKI67/MMD/NDRG1/N…
TP53	transcription regulator	Inhibited	3.527	9.57e-17	ACER2/ACTA2/ACTL6A/ACTN1/ADAM8/AKAP12/AMOTL2/ANXA1/APAF1/ASF1B/ATF3/BDNF/BHLHE40/BIRC5/BNIP3/BUB1/BUB1B/CCNA2/CCNB1/CCND2/CCNE2/CCNG2/CCNL1/CDC16/CDC20/CDC25A/CDC6/CDK1/CDKN1A/CDKN1B/CEP55/CERS6/CHEK1/CITED2/CKAP2/CNN1/CNN2/CTGF/CXCL12/CYP19A1/DBP/DDIT3/DDIT4/DHFR/ESR1/EXO1/FASN/FBXW7/FDPS/FKBP5/GADD45A/GAS1/GLUL/GTF2H1/H2AFX/HK2/HMGCR/HMOX1/HS3ST1/HSPA4L/HSPH1/ID1/IDH1/ING2/ING3/JUNB/KIF23/KITLG…
EGLN	group	Activated	-3.841	2.16e-13	ADM/ANKRD37/APAF1/BNIP3/CA9/CCDC58/DDX41/DHRS13/EGLN3/EIF4EBP1/FAM57A/GYS1/HK2/HLA-B/LZTFL1/MPI/PFKP/PGAM1/PPME1/RLF/RNF122/RNF165/SAP30/SLC27A1/STC1/TMEM107/VLDLR/ZNF292
HIF1A	transcription regulator	Inhibited	3.777	1.19e-12	ABCF2/ACTA2/ADM/AKAP12/ALDOA/ANGPTL4/APLN/BNIP3/CA9/CDKN1A/CDKN1B/Cdkn1c/CEMIP/CHKA/COX4I2/CTGF/CXCL12/CXCR4/CYP19A1/CYR61/DDIT4/EGLN3/ENO2/EREG/ERO1A/H2AFX/HK2/HMOX1/ID1/INHBB/JUN/KDM3A/LIFR/LOXL2/NAE1/NDRG1/PFKFB3/PFKL/PGK1/SDC4/SERPINE1/SLC16A3/SLC2A1/SMAD7/SOCS3/STC2/TFRC/TGFB1/THBS1/TLR6/VCAM1
PDGF BB	complex	Inhibited	2.955	1.51e-12	ACTA2/ADM/ATF3/BHLHE40/CCNL1/CDKN1B/CNN1/CTGF/CYR61/DDIT3/EREG/GADD45A/GFPT2/JUN/JUNB/KLF10/KLF6/NAMPT/NFIL3/NR4A1/PIM1/PPP1R15A/RND3/SLC2A3/SOCS3/TAGLN/THBS1/TNFAIP3/ZFP36/ZFP36L1
E2F1	transcription regulator		0.114	2.05e-11	ALG5/ANGPT2/APAF1/BIRC5/BNIP3/CCNA2/CCNB1/CCND2/CCNE2/CDC20/CDC25A/CDC6/CDK1/CDKN1A/CDKN1B/CITED2/CRABP2/DHFR/DUSP10/ECT2/FANCD2/HIST1H4H/IDH3A/KIF23/MAP3K5/MCM10/MCM6/MSH2/NDC80/NEDD8/NUSAP1/PCLAF/PCNA/PIK3R1/PRPS2/PSAT1/RND3/RRM2/SERPINE1/SMC4/SRPRA/SRSF2/TAP1/THBS1/TK1/TOP2A/TOP2B/VCAM1/VEGFB/ZFP36
E2F4	transcription regulator		#VALUE!	5.82e-11	ASF1B/BNIP3/CCNA2/CCNE2/CDC25A/CDC6/CDK1/CDKN1A/CENPA/CENPE/CHEK1/DHFR/ECT2/H2AFX/HIST1H3D/KIF4A/MCM10/MCM6/MKI67/MSH2/NDC80/PCLAF/PCNA/PRC1/PSAT1/PTTG1/RRM2/SERPINE1/SFPQ/SMC2/SMC4/SRPRA/SRSF2/TK1/TOP2A
CSF2	cytokine	Activated	-3.503	1.6e-10	ABCA1/ADAM8/BIRC5/BUB1/BUB1B/CCNA2/CCNB1/CDC20/CDCA8/CDK1/CDKN1A/CENPE/EXO1/HSPH1/IL1R1/KIF11/KNTC1/MAT2A/MCM6/MKI67/MMD/NCAPH/NUSAP1/PIK3CG/PIM1/POLE/PRC1/RARA/RBM3/RIPOR2/RRM2/SKA1/SKA3/SMC2/SPAG5/SPC25/TGFB1/TOP2A/UPP1
TFRC	transporter		1	1.68e-10	APAF1/ATF3/BNIP3/CCNA2/CCNB1/CDC20/CDK1/CDKN1A/DDIT3/DDIT4/ERO1A/GADD45A/HK2/HMOX1/JUN/PFKFB3/PPP1R15A/SLC11A2/SLC26A11/SLC2A1/STC2/TGFB2
Pkc(s)	group		1.158	1.7e-10	ABCA1/ACTA2/ADM/APLN/ATF3/CDC6/CDKN1A/CDKN1B/CNN1/CPT1A/DBP/DDIT3/DNAJC3/GADD45A/HMGCR/HMOX1/JUN/JUNB/KLF6/KRT8/NQO1/NR1D1/PPP1R15A/SERPINE1/TAGLN/TGFB1
FSH	complex	Activated	-3.375	1.97e-10	ACTA2/ACTG2/ACTN1/ADM/AKAP12/AMOTL2/BDNF/CCND2/CITED1/CREM/CTGF/CXCR4/CYP19A1/DHRS3/ELL2/EREG/ESR1/FKBP5/FSHR/HK2/HSD17B1/ING2/INHA/INHBB/KLF10/KRT18/LDLR/MAMLD1/MAP3K5/PAWR/PCNA/PGK1/RAB27A/RARA/RGS4/RGS7/SLC2A1/SMAD7/TFRC/TGFB2/TGFBR3/THBS1/TK1/TNFAIP3/TNFAIP6/UPP1/USPL1/ZEB1
FOXM1	transcription regulator	Activated	-4.236	3.23e-10	BIRC5/BUB1B/CCNA2/CCNB1/CCND2/CCNE2/CDC20/CDC25A/CDCA8/CDK1/CDKN1A/CDKN1B/CENPA/CENPE/CXCL12/ESR1/KIF20A/MKI67/PCNA/PGK1/PLK4/PRC1/SKP2/ZEB1
PTGER2	g-protein coupled receptor	Activated	-3.682	3.23e-10	ASPM/BUB1B/CCNA2/CENPE/CEP55/CXCR4/CYP19A1/DEPDC1/ECT2/H2AFX/KIF11/KIF20A/KIF2C/MKI67/NUF2/NUSAP1/PBK/PIM1/PRC1/PTGES/SPAG5/STIL/THBS1/TNFAIP6
TGFB1	growth factor	Inhibited	2.07	4.14e-10	ACTA2/ADM/ANGPTL4/ANKRD1/ASPM/ASPN/BDNF/BHLHE40/BIRC5/BUB1/BUB1B/CCNA2/CCNB1/CCND2/CCNE2/CDC20/CDK1/CDKN1A/CDKN1B/CENPA/CENPE/CITED2/CTGF/CXCR4/CYP19A1/DBP/DZIP3/EDNRA/EREG/F2RL1/FAM107A/FASN/FBLN5/GPR85/HLA-DQB1/HMOX1/ID1/INHA/INHBB/JUN/JUNB/LIFR/LTBP3/MKI67/NDC80/NEDD9/POLE2/PRC1/PTGES/PTHLH/PTX3/RARA/RORA/SAMHD1/SEMA7A/SERPINE1/SMAD7/SMC2/SOCS3/TAGLN/TGFB1/TGFB1I1/TGFB2/TGFBI/TGFBR3/THBS1/TIMP…
NEDD9	other	Inhibited	3.357	4.4e-10	ADM/ANKRD37/BHLHE40/BNIP3/CA9/DDIT4/ERRFI1/NRN1/PFKP/PGK1/PPP1R3B/SERPINE1/SLC2A1/STC1/TXNIP
CD38	enzyme	Inhibited	2.546	6.62e-10	ALDOA/ATP1B1/BNIP3/CCND2/CITED2/CPEB3/EGLN3/EIF4EBP1/ELL2/ERO1A/FAM162A/FGL2/GBE1/GPAM/MANF/NABP1/NDRG1/NFIL3/PDLIM1/PFKL/PFKP/PIM1/PSAT1/SAP30/SKA1/SLC16A3/SLC2A1/SOCS1/SOCS3/VCAM1
ESR1	ligand-dependent nuclear receptor	Activated	-2.592	7.1e-10	ACKR3/AHNAK/ASPM/BIRC5/CA2/CALB1/CCNA2/CCNG2/CDK1/CDKN1A/CDKN1B/CENPA/CENPU/CLIC3/CRABP2/CXCL12/CYP19A1/CYP1B1/DDIT4/EREG/ESR1/FSHR/GHR/GPAM/GREM1/GUCY1B3/HLA-B/HMGCR/HOXC6/ID1/INHBB/JUN/KIF23/KNL1/LDLR/MKI67/MMD/NCAPH/NR1D1/PBK/PCNA/PDCD5/PLK4/PTTG1/PTX3/RARA/SAMHD1/SERPINE1/SFPQ/SIPA1L1/SLC7A11/SMC4/STC2/TCIM/TNFAIP3/TNFAIP6/TNFRSF10A/TXNIP/UBALD1
MYC	transcription regulator		-1.093	1.73e-09	ACACA/ADM/AKAP12/ALDOA/AMD1/ANGPT2/BUB1/BUB1B/CCNA2/CCNB1/CCND2/CCNE2/CCNG2/CDC20/CDC25A/CDK1/CDKN1A/CDKN1B/CHEK1/CHKA/CITED1/CRABP2/DDIT3/DDIT4/FASN/FBXO32/FKBP5/GADD45A/GGH/HIVEP2/HK2/HMOX1/HNRNPA2B1/HOXA4/HSPH1/ID1/IDH1/IRX3/JUN/KLF10/KLF6/LRRN1/MAN2A1/MAT2A/MCM6/MKI67/MYL9/NOLC1/Pdlim3/PFKFB3/PFKL/PFKP/PGAM1/PGK1/PHF21A/PIAS1/RRM2/SAE1/SERPINE1/SKP2/SLC16A3/SLC2A1/SLC2A3/SRM/SRSF1/TFRC/TGFB2/…
EPAS1	transcription regulator	Inhibited	2.003	3.86e-09	ABCF2/ACACA/ADM/AKAP12/ANGPTL4/APLN/BNIP3/CA9/CDKN1A/CEMIP/CHKA/CITED2/CLK3/CTGF/EGLN3/ENO2/FASN/INHBB/KDM3A/LDLR/LOXL2/NDRG1/PFKFB3/SERPINE1/SLC11A2/SLC2A1/STC2
INHA	growth factor		0.477	4.01e-09	ACTA2/ACTG2/CCND2/CDKN1B/CNN1/CTGF/CYP19A1/CYP1B1/CYR61/EREG/IL1R1/INHA/INHBB/KITLG/KRT18/KRT8/MYH11/MYL9/PCDH7/PIK3R1/PTX3/SMAD7/SMARCA1
IL5	cytokine	Inhibited	2.598	4.92e-09	ALDOA/ATP1B1/BNIP3/CCND2/CITED2/EGLN3/EIF4EBP1/ELL2/ERO1A/FAM162A/FGL2/GPAM/HSPH1/MANF/MAT2A/MMD/NABP1/NDRG1/NFIL3/PDLIM1/PFKP/PIM1/PSAT1/RBM3/RIPOR2/SAP30/SKA1/SLC16A3/SLC2A1/SOCS1/TGFB1/UPP1
FOXO3	transcription regulator	Inhibited	3.211	7.28e-09	APAF1/APLN/BIRC5/BNIP3/CCND2/CCNG2/CDKN1A/CDKN1B/CTGF/DDIT3/ENO2/ESR1/FABP5/FASN/FBXO32/FLNB/GADD45A/HMGCR/IL1R1/JUNB/MXI1/NAMPT/NDRG1/PRKAA2/SKP2/TGFB1/TXNIP/VCAM1
RBL1	transcription regulator		-1.404	1.28e-08	CCNA2/CDC25A/CDC6/CDK1/CDKN1A/CDKN1B/Cdkn1c/DHFR/DUSP10/MCM10/PCNA/RRM2/SKP2/THBS1/VEGFB/ZEB1
CREM	transcription regulator	Inhibited	2.94	1.29e-08	ABCA1/ATF3/BHLHE40/CCND2/CRABP2/CREM/CSRNP1/CYP19A1/ERRFI1/HMGCR/INA/INHA/JUNB/LDLR/LSS/NFIL3/NR4A1/PGK1/PPP1R15A/Sik1/SMC4/THBS1/TIPARP
Cg	complex		1.489	1.85e-08	ACTA2/ADM/APLN/BDNF/BHLHE40/CCND2/CCNE2/CDC6/CDKN1A/CDKN1B/CREM/CXCR4/CYP19A1/EREG/F2RL1/FABP5/FGL2/G0S2/GAS1/HK2/HMGCR/HPSE/IL33/INHA/INHBB/JUN/MCM10/NR4A1/PCNA/PFKFB3/PKIA/PTGFR/PTX3/RECQL/RGS4/RORA/SDC4/SMARCA1/ST8SIA4/STC1/TGFB2/TGFBR3/TNFAIP6/TSPAN13/UPP1
NFYA	transcription regulator		-0.254	1.99e-08	APAF1/CCNB1/CDCA8/CDKN1A/FASN/GADD45A/GPAM/GUCY1B3/IBSP/LMAN1/PGK1/PTTG1/RGS4/TXNIP
ERBB2	kinase		-1.385	2.54e-08	ADAM8/ALAD/ANGPTL4/ASPM/ATP1B3/BHLHE40/BIRC5/BUB1/BUB1B/CCNA2/CCNB1/CCNE2/CDC16/CDC20/CDC25A/CDC6/CDCA8/CDK1/CDKN1A/CDKN1B/CENPA/CENPE/CHEK1/CTGF/CXCL12/DHFR/DZIP3/EIF4EBP1/EREG/ETV5/FASN/GBE1/GHR/GPAM/ID1/JUN/JUNB/LTBP3/MCM10/MCM6/MKI67/MMP16/NDC80/NEDD9/PCNA/PGK1/POLD4/POLE/POLE2/PRC1/PTGES/RRM2/SERPINE1/SLC2A1/SMAD7/SMC2/TAGLN/THBS1/TK1/TOP2A
YY1	transcription regulator		0.283	2.64e-08	ANKRD1/BDNF/BIRC5/BUB1B/CCNA2/CCNB1/CDC6/CDKN1A/Cdkn1c/CENPA/CENPE/CXCL12/DROSHA/H2AFX/KIF11/KIF20A/KIF23/KIF2C/LMAN1/LMNB1/MAT2A/MCM6/MKI67/MYH11/PAWR/PIAS1/PPP1R15A/PRC1/RND3/SFPQ/SRSF1/TGFB2/TGFBI/TNFRSF10A/TOP2A/VEGFB/WSB1
ATF4	transcription regulator		1.884	3.56e-08	ABCA1/ANKRD1/ATF3/CA9/CDKN1A/CDKN1B/CEBPG/CPT1A/CTH/DDIT3/DDIT4/EIF4EBP1/ERO1A/FASN/GADD45A/GYS1/IBSP/JUN/NDRG1/PSAT1/PTX3/SLC7A11/STC2/TRIB3/WFS1
CREB1	transcription regulator		1.703	3.64e-08	ABCA1/ATF3/BDNF/BHLHE40/BIRC5/CCNB1/CDCA8/CREM/CSRNP1/CYR61/ERRFI1/HMGCR/INA/INHA/JUNB/LDLR/LSS/MAT2A/MCM6/MKI67/NFIL3/NR4A1/PCNA/PPP1R15A/Sik1/SLC2A3/TIPARP
Growth hormone	group		-1.058	6.07e-08	ACACA/ANGPTL4/ARID5B/CALB1/CCND2/CITED2/CYB5B/FASN/FDPS/FKBP5/ID1/JUN/JUNB/KLF10/LDLR/NEDD9/NR1D1/PCNA/PFKFB3/PPP1R15A/SLC2A1/SOCS1/SOCS3/SSTR1/STC1/TXNIP/XDH
IKBKB	kinase		0.066	7.6e-08	ABCA1/ANKRD1/ATF3/CCNA2/CCNE2/CDC6/CDKN1A/CTGF/CXCL12/CXCR4/CYP1B1/ECT2/EREG/FASN/H2AFX/HK2/HMOX1/JUNB/KIF20A/KIF23/LIFR/LMNB1/MAT2A/PCDH7/PTX3/SKP2/SMAD7/SOCS1/SOCS3/TGFB1/TIMP3/TLR3/VCAM1
PPARG	ligand-dependent nuclear receptor		0.203	8.92e-08	ABCA1/ACACA/ACTA2/ANGPTL4/BIRC5/CA2/CDKN1A/Cdkn1c/CPT1B/CRABP2/CYP19A1/DHRS3/EGLN3/EIF4EBP1/ELOVL6/ENO2/ERO1A/FABP5/FASN/FDPS/GPAM/HEBP1/HIVEP2/HK2/IDH1/JUN/KLF6/LDLR/MKI67/NDRG1/NPEPPS/NR1D1/NR4A1/PC/PCNA/PFKFB3/PTGES/SERPINE1/SLC25A20/SLC27A1/SLC2A1/SOCS1/TAGLN/TRAF6/TRIB3/VCAM1/VNN1
COMMD1	transporter	Activated	-2.53	1.23e-07	ALDOA/BNIP3/DDIT4/EGLN3/HK2/PFKFB3/PFKP/PGK1/STC2/TFRC
PI3K (family)	group		-1.086	1.3e-07	ABCA1/ACTA2/ADM/BIRC5/CCNG2/CDKN1B/Cdkn1c/CXCL12/CXCR4/DDIT3/DDIT4/ESR1/FASN/FBXO32/HMOX1/NQO1/RDH10/SERPINE1/SLC2A1/THBS1/TXNIP
RABL6	other	Activated	-4.123	1.85e-07	BUB1/BUB1B/CCNA2/CCNB1/CCNE2/CDC25A/CHEK1/H2AFX/HMOX1/KIF23/MCM10/NDC80/PBK/POLE2/PRC1/PSME3/TOP2A
IGF1	growth factor		0.457	2.37e-07	ABCA1/ABCF2/ACTA2/ADM/AMIGO3/BDNF/BHLHE40/BIRC5/CCNG2/CDKN1A/CDKN1B/CITED2/CNN1/DDIT3/ERRFI1/FBXO32/FSHR/GADD45A/GHR/ID1/INHA/JUN/MXI1/NR4A1/POLD4/SERPINE1/SLC2A1/SRM/TAP1/TGFB1/TGFBI/THBS1/UGCG/ZFP36
PGR	ligand-dependent nuclear receptor		0.874	2.69e-07	AK4/AMD1/ATP1B1/CDC6/CDH12/CDK1/CDKN1A/CPT1B/CYP19A1/EDNRA/ESR1/FKBP5/GLUL/HPCAL1/ID1/IL1R1/KRT18/NDRG1/NEDD9/PCNA/PDLIM1/PFKP/RAB9A/SLC9A3R1/SNAPC1/SNTB2/UGCG/ZEB1
KDM5B	transcription regulator	Inhibited	3.058	3.05e-07	BUB1B/CCNB1/CDK1/DDIT3/DLGAP5/DPY19L1/ECT2/ESR1/FABP5/GADD45A/IPP/KIF2C/NCAPH/NDC80/NDE1/NEDD9/OSER1/PBK/PSME3/RECQL/TGFB1/TOP2A
SREBF1	transcription regulator		-0.798	3.25e-07	ABCA1/ACACA/AK4/ALDOA/BHLHE40/CAMK1D/CDKN1A/CYCS/ELOVL6/FABP5/FASN/FBXO32/FDPS/GPAM/HK2/HMGCR/HMOX1/HSD17B1/IDH1/LDLR/LSS/NFIL3/NSDHL/PIK3R3/PTGDS/RDH11/S100A13/SERPINE1/SLC22A5/TGFB1
FGF2	growth factor		1.237	3.55e-07	ACTA2/BIRC5/CCND2/CDKN1B/CXCL12/CXCR4/DDIT3/EREG/ETV5/FGF23/GADD45A/JUN/JUNB/LEF1/PGK1/SERPINE1/SLC2A1/TAGLN/TGFB2/TGFBR3/TOP2A
AREG	growth factor	Activated	-3.5	3.8e-07	ARHGAP11A/BIRC5/CCNA2/CCNB1/CDC20/CDCA8/CENPA/EREG/HIST1H2BG/KIF20A/MKI67/PRC1/RRM2/SAE1/TNFAIP6/TOP2A
RBL2	other		-0.896	5.06e-07	CCNA2/CCNB1/CDC25A/CDC6/CDK1/CDKN1A/CDKN1B/Cdkn1c/DHFR/DUSP10/PCNA/RRM2/VEGFB/ZEB1
FOXO1	transcription regulator		-0.325	7.67e-07	ACACA/ANGPTL4/APAF1/APLN/ASPM/BIRC5/CA2/CCNA2/CCNB1/CCNG2/CDK1/CDKN1A/CDKN1B/Cdkn1c/CTGF/DEPDC1/DLGAP5/ELOVL6/FABP5/FASN/FBXO32/FDPS/FLNB/GADD45A/GPAM/IL1R1/JUNB/KIF11/KIF18A/MRPL45/NAMPT/NDUFAF4/NUSAP1/PBK/PRC1/SPC25/TGFB1/THBS1/TRIB3/TXNIP/VCAM1
E2f	group	Activated	-2.208	1.24e-06	ALG5/CCNA2/CCNB1/CDC25A/CDC6/CDK1/DROSHA/E2F4/FANCD2/GOLT1B/KNTC1/MCM10/MCM6/NUSAP1/PCNA/PRR11/RECQL/RRM2/TMEM126A
CHEK1	kinase		-0.977	1.26e-06	BUB1/BUB1B/CDC25A/CDKN1A/Cdkn1c/H2AFX/PCNA/RRM2
PPARA	ligand-dependent nuclear receptor		0.239	1.59e-06	ABCA1/ACACA/ANGPTL4/CCNA2/CCNB1/CDK1/CDKN1A/CHKA/CPT1A/CPT1B/CTH/CXCL12/CYB5B/ECI1/ELOVL6/FABP5/FASN/FDPS/G0S2/GPAM/H2AFX/HMGCR/KIF20A/KIF2C/KIF4A/KRT8/LIFR/LSS/MKI67/MMD/NR1D1/NSDHL/PC/PCNA/PPA1/PRC1/SLC25A20/SLC27A1/SMC2/SMC4/SRM/TOP2A/VCAM1/VNN1
NELFA	other	Activated	-2	1.79e-06	CCNE2/CDKN1A/CYP1B1/DLGAP5/JUNB/TOP2A
KRAS	enzyme		-0.396	1.81e-06	ALDOA/ATP1B1/BNIP3/CDKN1A/CDKN1B/DDIT3/E2F4/EREG/ERO1A/ETV5/FAH/GADD45A/GAS1/GLUL/GPC5/JUN/MAN2A1/MMD/NDE1/NQO1/NRN1/NXN/PAWR/PFKL/PRC1/SCMH1/SDC4/SEC11C/TAP1/THBS1/TNFRSF10A/TOP2A/UPP1/ZFP36L1
INHBA	growth factor		1.032	2.49e-06	ACTA2/ACTN1/AMMECR1/CALB1/CCND2/CDC25A/CDKN1A/CPNE8/CTGF/CXCR4/CYP19A1/DTNA/EREG/ESR1/FSHR/INHA/INHBB/JUNB/SMAD7/SOCS1/TAGLN
AHR	ligand-dependent nuclear receptor		-1.663	2.75e-06	ACACA/ACTA2/ACTL6A/ACTN1/ADM/APAF1/ASPN/CCNA2/CCNB1/CDK1/CDKN1A/CDKN1B/CYP1B1/DHFR/ESR1/FBLN5/GADD45A/GAS1/GPAM/JUNB/LTBP3/NQO1/SEMA3F/SERPINE1/SHB/SLC1A1/SOCS3/SYT12/TGFB1/TGFB2/TGFBI/THBS1/TIMP3/TIPARP/TK1
SP1	transcription regulator		0.157	3.39e-06	ABCA1/ACTA2/AKAP12/ATF3/B4GALT5/BIRC5/CCND2/CDKN1A/CDKN1B/CITED2/CREM/CTH/CXCR4/CYP19A1/DHFR/DLC1/ESR1/GHR/HK2/HMGCR/HMOX1/HPSE/HSD17B1/JUN/KRT18/LDLR/LTBP3/MAT2A/NDRG1/PGK1/PIM1/PTTG1/SERPINE1/SLC11A2/SLC2A1/SLC2A3/SMAD7/SOCS1/TGFB1/TGFB2/TIMP3/UGCG
ERK1/2	group	Inhibited	3.947	3.4e-06	ABCA1/APLN/BDNF/CCND2/CDK1/CDKN1A/CDKN1B/CTGF/CXCR4/CYP19A1/DDIT3/ESR1/FKBP5/HK2/ID1/JUN/JUNB/NAMPT/PCNA/PFKFB4/PTGES/SERPINE1/SOCS3/SSTR3/TAP1/VCAM1/VNN1
SIN3B	transcription regulator		#VALUE!	4.23e-06	CCNG2/DDIT3/DHFR/FBXO32/KLF10/KLF6/RRM2/TXNIP
FADD	other		0	4.34e-06	ASB13/CXCR4/DHX58/ELMOD2/JUN/JUNB/KLF6/NFIL3/PIM1/PPP1R15A/SOCS1/ST8SIA4/TIPARP/TLR3/TNFAIP3
NFYB	transcription regulator		#VALUE!	4.35e-06	CCNB1/CDCA8/CDK1/GADD45A/GPAM/IBSP/PTTG1/RRM2/TOP2A
TP63	transcription regulator		-1.18	5.46e-06	ACTL6A/ADM/APAF1/BHLHE40/CCNA2/CCND2/CDK1/CDKN1A/CDKN1B/CITED2/CXCR4/CYR61/DDIT4/DUSP10/FASN/GADD45A/HK2/HOXC4/KIF23/KLF6/MCM10/PCNA/PIK3R3/PPP1R13L/PTHLH/SERPINE1/TAGLN/TGFB1/TGFB2/THBS1/TIMP3/TNFAIP8/TNFRSF10A/ZEB1
ATP7B	transporter		-0.302	5.56e-06	CDC20/ELOVL6/FABP5/FASN/FDPS/HMGCR/LDLR/LSS/PTTG1/SMC2/SMC4
BNIP3L	other	Inhibited	3.053	5.63e-06	CCNA2/CCNE2/CENPE/CHEK1/CKAP2/FANCD2/GADD45A/KIF11/NUF2/RRM2/TFRC/TGFB1/TOP2A
HIF1AN	enzyme	Activated	-2.189	6.32e-06	ADM/ANKRD37/CA9/EGLN3/HK2
MEF2D	transcription regulator		1.501	6.77e-06	BDNF/CCNE2/CDC6/CTGF/JUN/JUNB/MCM6/MEF2A/NR4A1/PCNA/ZEB1/ZFP36
FSHB	other		-1.526	7.19e-06	CCND2/CTGF/CYP19A1/FABP5/FSHR/INHA/INHBB/KITLG
SREBF2	transcription regulator		-1.97	7.19e-06	ACACA/CAMK1D/CDKN1A/ELOVL6/FABP5/FASN/FDPS/HMGCR/HSD17B1/IDH1/LDLR/LSS/NSDHL/RDH11
EGR1	transcription regulator	Inhibited	2.639	8.02e-06	ACTA2/ATF3/CCND2/CDC20/CDKN1A/CREM/EREG/GADD45A/HMGCR/HMOX1/HPSE/JUN/JUNB/NDRG1/PTGES/SERPINE1/SOCS1/TGFB1/THBS1/VCAM1
CCND1	transcription regulator		-1.492	9.62e-06	AHNAK/ASPM/BIRC5/CCNA2/CCND2/CCNE2/CDC6/CDCA8/CDKN1A/CDKN1B/CEP55/CIP2A/E2F4/EREG/ERRFI1/ESCO2/FAM129B/HIST1H4H/ID1/JKAMP/KIF11/KIF20A/KIF20B/KIF2C/KIF4A/KNL1/LNP1/MAP3K5/NCAPH/PCLAF/PCNA/RRM2/SPC25/TUBA1C
INS	other	Inhibited	2.1	9.82e-06	ACACA/ADM/CDKN1A/CITED2/CPT1A/CRABP2/CTGF/CYR61/DDIT3/EIF4EBP1/ERRFI1/FASN/HMGCR/JUN/JUNB/NR4A1/RDH10/SSTR1/TGFB1/UGCG/VLDLR
TERC	other		#VALUE!	1.02e-05	ALAD/CDC20/CDKN1A/CDKN1B/HMGCR/MCM10/NR1D1/PRC1/TGFB1
INSIG2	other	Inhibited	2.594	1.05e-05	ACACA/ELOVL6/FASN/FDPS/GPAM/HMGCR/LDLR
AR	ligand-dependent nuclear receptor		0.573	1.11e-05	ABCA1/ADM/AMD1/ANKRD1/BIRC5/BUB1/BUB1B/CCNA2/CDKN1A/Cdkn1c/CENPE/CIT/CXCL12/DDIT4/EDNRA/EHD3/ENO2/ERO1A/FABP5/FKBP5/FSHR/HMGCR/HSPB7/HSPH1/IL1R1/INHA/KIF2C/KITLG/KNTC1/KPNA2/LMAN1/NUSAP1/PTGDS/PTHLH/SERPINE1/SKP2/SLC2A3/SLC7A11/SLCO3A1/TGFB2/THBS1
CDKN1A	kinase	Inhibited	3.739	1.25e-05	ACTA2/BIRC5/CCNA2/CCNB1/CDC25A/CDK1/CDKN1A/CDKN1B/CHEK1/EDNRA/EXO1/IL1R1/KRT18/PCLAF/TOP2A
CEBPA	transcription regulator		0.096	1.3e-05	ACACA/AKAP12/ANXA1/APLN/C3AR1/CA2/CCNA2/CCND2/CDKN1A/CPT1A/CRABP2/CXCR4/CYCS/CYP19A1/DHFR/FASN/G0S2/GAS1/GGH/HLA-B/HMGCR/HMOX1/ID1/JUN/NFIL3/NR1H4/PCNA/PPP1R3C/PTGFR/PTX3/RORA/SERPINE1/TGFB2/THBS1/THRB/TNFAIP6/TNFRSF10A/VLDLR
E2F3	transcription regulator		-1.994	1.45e-05	BIRC5/CCNA2/CCNB1/CDC25A/CDC6/CDK1/CDKN1A/DHFR/FBLN5/HIST1H2BG/HIST1H3D/NECTIN1/PCLAF/PCNA/PTTG1/RRM2/SERPINE1/THBS1/TIMP3/TK1
FOXO4	transcription regulator		1.492	1.56e-05	ACACA/APLN/BNIP3/CCNG2/CDKN1A/CTGF/ELOVL6/FABP5/FASN/FLNB/GADD45A/HMGCR/IL1R1/NAMPT/TGFB1/VCAM1
ARNT	transcription regulator	Inhibited	2.358	1.56e-05	ADM/ALDOA/ANGPTL4/BNIP3/CA9/CCND2/CXCR4/CYP1B1/ERO1A/GAS1/HK2/KIF20A/NQO1/PGK1/SLC2A1/SLC2A3
CCNA2	other		#VALUE!	1.73e-05	CCNA2/CDKN1A/CDKN1B/PCNA
26s Proteasome	complex		-0.358	1.93e-05	APAF1/CCNA2/CCNE2/CDC25A/CDC6/CDK1/CDKN1A/CDKN1B/CENPE/DDIT3/EREG/EXO1/H2AFX/JUNB/KIF23/MYCBP/SOCS3/TK1/TOP2A/TXNIP
MED28	other	Activated	-2.165	2.09e-05	ACTA2/ACTG2/CNN2/MYH11/TAGLN
TAZ	enzyme	Inhibited	2.236	2.09e-05	ANKRD1/CTGF/CYR61/PPP1R3B/TAGLN
PBRM1	other		#VALUE!	2.09e-05	CCNB1/CDK1/CDKN1A/CENPE/CRABP2
E2F7	transcription regulator		#VALUE!	2.09e-05	CCNA2/CCNB1/CDC6/ECT2/KIF23
UXT	transcription regulator		1.882	2.16e-05	BUB1/CCNA2/CDC6/CHEK1/ENO2/FKBP5/KRT18/TLR3/TNFAIP3
EIF2AK3	kinase	Inhibited	2.355	2.53e-05	ABCF2/APAF1/ATF3/CA9/CEBPG/DDIT3/DNAJC3/EIF4EBP1/ERO1A/GADD45A/JUN/NDRG1/NFIL3/PPP1R15A/TXNIP/WFS1/ZFP36
ATM	kinase		1.092	2.84e-05	CDKN1A/CDKN1B/CTGF/GADD45A/HMOX1/JUN/PCNA/RRM2/SERPINE1/TNFAIP3
PRKG1	kinase		0.128	3.13e-05	ACTA2/CTGF/RAD1/SERPINE1/TAGLN/TGFB1/VCAM1
POR	enzyme		0.336	3.44e-05	ABCA1/CAPRIN2/CPT1A/CYB5B/ECI1/ELOVL6/EREG/FDPS/FLVCR2/GSTA3/HLA-DQB1/HMGCR/HMOX1/HSPH1/LDLR/LSS/NSDHL/PFKFB3/SDC4/SLC22A5/TMEM229B/TMEM267/VNN1
PI3K (complex)	complex		0.279	3.61e-05	ABCA1/APLN/CCNB1/CCND2/CCNG2/CDKN1B/DDIT3/DDIT4/FBLN5/FBXO32/HMGCR/HMOX1/IL33/LEF1/NQO1/PIK3CG/PIM1/RND3/SERPINE1/TNFAIP3/TXNIP/UGCG
RARA	ligand-dependent nuclear receptor	Activated	-2.54	3.66e-05	ABCA1/ASPM/BIRC5/CCNA2/CDK1/CDKN1A/CDKN1B/CENPA/CENPU/CRABP2/CYP19A1/ELL2/GHR/HLA-B/IL1R1/KIF23/KNL1/LIFR/NCAPH/NEDD9/OAS1/PBK/PIK3CG/PLK4/PTTG1/SAMHD1/SFPQ/SIPA1L1/SLC7A11/SMC4/TNFRSF10A
RRP1B	transcription regulator		#VALUE!	3.68e-05	APAF1/BIRC5/CCNA2/CDC20/CDC6/CDK1/CDKN1A/CHEK1/DHFR/EXO1/GADD45A/HDAC11/KIF11/MCM6/PCNA/RARA/TGFB1/TOP2A
BMP6	growth factor		-0.864	3.8e-05	ACTA2/ARHGAP18/CTGF/CYP1B1/ERRFI1/ETV5/FSHR/HMOX1/IBSP/ID1/SAP30/SMARCA1/TAGLN/ZEB1
ACTL6A	other		-1.414	4.16e-05	APAF1/CCNA2/CCNB1/CCND2/CCNE2/CDKN1A/CDKN1B/HMOX1
IgG	complex		-0.804	4.32e-05	ADM/ATP1B1/ATP1B3/CCND2/CDKN1A/CRABP2/DDIT3/FABP5/KRT18/LDLR/PIM1/PPP1R15A/RND3/SERPINE1/SLC2A3/TGFB1/TNFAIP3/UGCG/ZFP36/ZMPSTE24
PML	transcription regulator		1.889	4.54e-05	ACACA/ACSM1/BIRC5/CDKN1A/CIT/CPT1A/CPT1B/FASN/GPAM/HMGCR/HMOX1/LDLR/NDRG1/NQO1/SLC25A20
EGFR	kinase		-1.269	4.72e-05	ACTA2/CCNA2/CCT5/CDK1/CDKN1B/CRMP1/CTGF/CYP19A1/DDIT3/EREG/ESR1/FASN/HK2/HNRNPA2B1/JUN/JUNB/LRP8/NSUN2/NUTF2/PTGES/SEMA7A/SERPINE1/SKP2/SLC7A11/SRSF1/TNFAIP6/ZEB1
CEBPB	transcription regulator		1.128	4.98e-05	ACTA2/APLN/CCNA2/CCND2/CDC25A/CDC6/CDKN1A/CDKN1B/CIRBP/CPT1A/CXCR4/CYP19A1/DDIT3/DHFR/DHX9/FBXO32/GADD45A/GAS1/JUN/KRT18/MSH2/PCNA/PPP1R15A/PTGES/PTGFR/RGS4/RORA/SERPINE1/TGFB1/TRIB3/VLDLR/XDH
MNT	transcription regulator		-1.633	5.03e-05	CCND2/CCNG2/DDIT3/FBXO32/KLF10/KLF6/TXNIP
INSR	kinase		-1.876	5.21e-05	ALAD/ANKRD1/ATF3/BIRC5/CCND2/CCNG2/CDC6/CDK1/CDKN1A/CPT1B/CTGF/CXCR4/CYCS/CYP1B1/ECI1/EREG/FASN/FDPS/GADD45A/GAS1/HMGCR/IDH1/IDH3A/JUNB/KLF10/LSS/MXI1/NAMPT/NDRG1/NSDHL/PIM1/PSPC1/RRM2/SERPINE1/SLC25A20/SLC2A1/SOCS3/TGFB1/VCAM1
LIN28A	other	Activated	-2.2	5.28e-05	CDC20/CDC25A/CDK1/TARDBP/TIA1
TASP1	peptidase	Activated	-2.177	5.28e-05	CCNA2/CCNB1/CCNE2/CDKN1A/CDKN1B
E2F8	transcription regulator		#VALUE!	5.28e-05	CCNA2/CCNB1/CDC6/ECT2/KIF23
Igkv1-117	other		#VALUE!	5.28e-05	CCND2/CDKN1A/CDKN1B/JUN/JUNB
SNAI1	transcription regulator		-0.581	6.06e-05	ANKRD1/CCND2/CDKN1A/CTGF/CYP19A1/CYR61/IBSP/ID1/KRT18/KRT8/PFKP/ZEB1
USF1	transcription regulator		1.308	6.06e-05	ABCA1/AKAP12/APLN/CCNG2/CYP19A1/FASN/FBXO32/FSHR/GPAM/LDLR/SERPINE1/TXNIP
YAP1	transcription regulator		1.732	6.06e-05	ACTA2/AMOTL2/ANKRD1/BIRC5/CDKN1A/CTGF/CYR61/FBXO32/MYL9/PPP1R3B/SLC2A3/TAGLN
MAP2K1/2	group	Inhibited	2.372	6.06e-05	ATF3/BDNF/CDK1/CDKN1B/CTGF/DDIT3/H2AFX/HK2/PCNA/PIK3CG/Sik1/TGFB1
SCAP	other	Activated	-2.764	6.53e-05	ACACA/ELOVL6/FASN/FDPS/GPAM/HMGCR/HSD17B1/LDLR/LSS/NSDHL/RDH11
SIN3A	transcription regulator		-1.134	6.53e-05	BDNF/CCND2/CCNG2/DDIT3/ESR1/FBXO32/INA/KLF10/KLF6/MXI1/TXNIP
MAX	transcription regulator	Activated	-2.121	7.46e-05	CCND2/CCNG2/CDC25A/CDKN1A/DDIT3/DHFR/FBXO32/GADD45A/KLF10/KLF6/TMEM126A/TXNIP
STUB1	enzyme		-0.346	7.77e-05	ACTA2/CCNA2/CDK1/CDKN1A/MYH11/PCNA/TAGLN
PIAS1	transcription regulator		1.309	7.77e-05	ACACA/ACTA2/CDKN1A/FASN/GADD45A/MYH11/TAGLN
Hdac	group		-1.838	8.05e-05	APAF1/ATF3/BDNF/BIRC5/CCNG2/CDKN1A/CXCR4/DDIT3/EDNRA/FBXO32/HNRNPAB/IRX3/ITGA8/JUN/KLF10/KLF6/NR4A1/ROBO2/SPRY1/TXNIP
LCN2	transporter	Activated	-2.355	8.2e-05	ACTL6A/ACTN1/CKAP2/CYP19A1/ESR1/FASN/KIF11/KIF23/LDLR/NDE1/RARA
NRIP1	transcription regulator		-0.896	8.2e-05	ACACA/CCNG2/CDKN1A/CPT1B/FASN/IDH3A/MMD/PPP1R3B/PTX3/SLC25A20/TNFAIP6
RHOC	enzyme		-1	8.2e-05	ATF3/CDKN1A/DDIT3/GLUL
ASXL2	other	Inhibited	2.121	8.52e-05	ENO2/FAM162A/G0S2/GPCPD1/HK2/PELI2/PGK1/SERPINE1
CAV1	transmembrane receptor	Inhibited	2.608	9.35e-05	CDKN1A/ESR1/HK2/ID1/INHBB/KRT18/KRT8/NQO1/NR4A1/PCNA/SERPINE1/SLC1A1/SLC2A3/TGFB1I1/THBS1/VCAM1
IL13	cytokine		0.418	0.000102	ABCA1/ACKR3/ARNTL2/ATF3/BDNF/BLVRA/C3AR1/CIDEB/CTGF/CXCR4/DUSP10/FAM162A/G0S2/HPSE/IL1R1/JAKMIP2/KITLG/MCUR1/NCAPH/NCLN/PFKP/SLC26A6/SOCS1/ST8SIA4/TGFB1/THBS1/TNS1/VCAM1/VNN1
P38 MAPK	group	Inhibited	2.161	0.000102	ABCA1/ATF3/BDNF/BNIP3/CCND2/CCNG2/CDKN1A/CTGF/CXCL12/CXCR4/CYP19A1/DDIT3/FBXO32/HMOX1/JUN/JUNB/MSH2/MYH11/RARA/RND3/SERPINE1/SOCS3/TGFB1/THBS1/TOP2A/VCAM1
SCD	enzyme		-1.539	0.000102	ACACA/ANGPTL4/ATF3/CPT1A/CPT1B/DDIT3/FASN/GADD45A/GPAM/SLC27A1/SLC2A1
NCOA3	transcription regulator		-1.249	0.000102	CCNA2/CCNB1/CCNE2/CDC25A/CDC6/CDKN1A/FASN/HMOX1/PCNA/SLC2A1/TAGLN
TLR9	transmembrane receptor		0.479	0.000112	ABCA1/ATF3/CCNB1/CDKN1B/CERS6/CPM/CTH/HMOX1/IL33/MX1/NAMPT/NR1H4/NR4A1/ORMDL1/PFKFB3/SERPINE1/SGPL1/SOCS1/SOCS3/SPRY1/TGFB1/UGCG
ASXL1	transcription regulator	Activated	-2.121	0.000118	ENO2/FAM162A/G0S2/GPCPD1/HK2/PELI2/PGK1/SERPINE1
S100A6	transporter	Activated	-2.121	0.000118	ATF3/CENPA/DEPDC1/HS3ST1/NCAPH/PBK/STC1/TNFAIP3
SMAD4	transcription regulator		0.896	0.00012	ANGPT2/CCND2/CCNG2/CDKN1A/CDKN1B/CITED2/CTGF/EREG/GADD45A/HEBP1/ID1/NAMPT/PTX3/SAE1/SERPINE1/SMAD7/TGFB1/THBS1/TIMP3/TNFAIP6/TNFRSF10A
TCF3	transcription regulator		-0.24	0.000125	AATF/ASF1B/ATF3/BIRC5/CCNA2/CCND2/CDC20/CDK1/CDKN1A/CEP55/CIP2A/ESCO2/IQCB1/JUN/LEF1/MANF/MKI67/NDC80/NUF2/PRC1/RIPOR2/RRM2/SEC11C/SEMA3F/SPC25
TLR3	transmembrane receptor		0.213	0.000126	ABCA1/ATF3/CPM/CTH/DHX58/HMOX1/IL33/JUNB/Klrk1/LMNB1/MX1/NR4A1/OAS1/PFKFB3/PIK3R1/PIK3R3/PTGES/PTX3/SERPINE1/SOCS3/SPRY1/TLR3/ZC3HAV1
TSC2	other	Activated	-2.451	0.000126	ANXA1/ATF3/B3GALT2/BIRC5/CCND2/CDKN1A/CDKN1B/DDIT3/ERO1A/FAM107A/HK2/HMOX1/NSDHL/RASSF4/SLC2A1/TAGLN/ZFP36
BRCA1	transcription regulator		0.254	0.000126	BIRC5/CCNB1/CDKN1A/CDKN1B/CYP19A1/CYP1B1/DDIT3/DDIT4/ESR1/EXO1/GADD45A/GTF2H1/H2AFX/HMOX1/NQO1/PCNA/SFPQ
TNFRSF1A	transmembrane receptor		0.668	0.000126	ANGPT2/BDNF/CCNE2/CDC6/CDKN1A/CTGF/GHR/JUN/KNTC1/NQO1/PIM1/RGS7/SERPINE1/SOCS3/TFRC/TGFB1/VCAM1
SMAD7	transcription regulator		-1.249	0.000137	ACTA2/CDKN1A/CITED2/CTGF/ID1/KRT8/SMAD7/TAGLN/TGFB1
Irgm1	other	Inhibited	2.985	0.000137	BUB1/CCNA2/CCNB1/KIF20A/MKI67/RRM2/SPAG5/STIL/TK1
ELAVL1	other		-1.703	0.000139	ABCA1/ATF3/CDC6/CDKN1A/CENPA/CENPE/HMOX1/KIF11/KIF18A/NUF2/PBK/PRC1/PTHLH/TIA1/TOP2A
PRKCD	kinase		1.758	0.000144	ABCA1/BIRC5/BNIP3/CCNA2/CDKN1A/CEMIP/CXCL12/DDIT3/DENND3/KIF2C/KLF6/LDLR/OAS1/PPP1R15A/SERPINE1/SOCS1/SPRY1/UGCG/VCAM1/ZEB1
CBX5	transcription regulator		0.718	0.000165	BIRC5/CDC25A/CDC6/CDKN1A/CEMIP/CYP1B1/FKBP14/LEF1/OAS1/RORA/SLC2A10/SLC2A3/SYTL2/TGFBI/TSPAN13/TXNIP
TNF	cytokine		1.768	0.000166	A4GALT/ABCA1/ACKR3/ACTA2/ADAM8/ADM/APLN/ATF3/BDNF/BHLHE40/BIRC5/CA2/CCND2/CDKN1A/CEBPG/CITED2/CNN1/CXCL12/CXCR4/CYP1B1/DUSP10/EREG/F2RL1/G0S2/GADD45A/HK2/HLA-B/HMOX1/ID1/IL1R1/JUN/JUNB/KLF6/KRT18/KRT8/LIFR/LSS/MAFF/MMD/MSH2/NEDD9/NQO1/NR1H4/NUAK1/OAS1/PCDH7/PPP1R15A/PPP1R3C/PTGES/PTGFR/PTHLH/PTX3/RND3/RRM2/SDC4/SERPINE1/SOCS1/SOCS3/TAGLN/TAP1/TFRC/TGFB1/TIMP3/TLR3/TNFAIP3/TXNIP/UGCG/VCAM1/ZNF365
WT1	transcription regulator		0.036	0.000168	ACTN1/CDKN1A/CIRBP/CLIC1/CYP19A1/ENO2/EREG/ESR1/FDPS/GPC5/INHA/JUNB/LMAN1/LSS/NDRG1/SERPINE1/SLC2A3/SMC1A/SRSF6/TARDBP/TGFB1/THBS1/TIMP3/WDR90
IL2	cytokine		0.939	0.000171	ABCA1/ADAM8/ANXA1/CCND2/CCNE2/CCNG2/CDC25A/CDC6/CDKN1A/CDKN1B/CRMP1/CSRNP1/CXCL12/DHODH/FGL2/HK2/JUN/LIFR/LTB4R/MMD/NDRG1/NETO2/PCNA/PIK3R3/PIM1/PINX1/PNP/POLE2/PTHLH/SESN3/SLC2A3/SOCS1/STC2/TGFB1/TNFAIP8/TNFRSF10A/TRIB3
WISP2	growth factor		-1.066	0.000177	CTGF/ESR1/JUN/KRT18/KRT8/SERPINE1/TGFB1/TGFBR3/ZEB1
Jnk	group		1.287	0.00018	ACTA2/APLN/BIRC5/CTGF/CXCL12/DDIT3/FBXO32/JUN/KLF6/MSH2/NR4A1/PTGES/RARA/SERPINE1/SOCS3/TGFB1/VCAM1/ZFP36
CDK4	kinase		#VALUE!	0.000203	CDC6/CDCA8/CDKN1A/CEP55/CIP2A/DHFR/HIST1H4H/JKAMP/KIF11/KIF20A/KIF20B/KIF2C/KIF4A/KNL1/LNP1/NCAPH/PCLAF/SPC25
TCF4	transcription regulator		#VALUE!	0.000205	ASF1B/BIRC5/CCNA2/CDC20/CDK1/CEP55/CIP2A/ESCO2/IQCB1/JUN/LEF1/MANF/MKI67/NDC80/NUF2/PRC1/RIPOR2/RRM2/SEC11C/SPC25/ZEB1
PPARGC1A	transcription regulator		-0.386	0.000205	ACACA/CDKN1A/CIDEB/COX7B/CPT1A/CPT1B/CYCS/FASN/FBXO32/HK2/IDH3A/INHA/LDLR/LIFR/MCM6/NSDHL/PGAM1/PIK3R1/SLC39A14/SMAD7/SOCS1/SOCS3/TRIB3
TRIM24	transcription regulator		0.653	0.000206	CA2/CALB1/CNOT6/DHX58/FLRT3/GLUL/OAS1/PCLAF/PRPS2/PTHLH/SAMHD1/SOCS1/TAP1/TGFBI
CSF2RA	transmembrane receptor		0.492	0.000213	CCND2/JUN/JUNB/PIK3CG/PIM1
LINC01139	other	Inhibited	2.236	0.000213	ALDOA/ANGPTL4/ANKRD37/BHLHE40/SLC16A3
DYRK1A	kinase		1.767	0.000216	CCNB1/CDC6/CDK1/CDKN1A/KNTC1/SRSF2
NELFCD	other	Activated	-2	0.000233	CCNE2/DLGAP5/JUNB/TOP2A
CKS1B	kinase		-1.987	0.000233	CCNA2/CCNB1/CDK1/CDKN1B
LIN9	other		-1.98	0.000233	BUB1B/CDC6/CDK1/CDKN1A
GNA13	enzyme		1.964	0.000233	ACTA2/CNN1/MYH11/TAGLN
EBF1	transcription regulator		-1.373	0.000239	CXCL12/EIF4EBP1/FASN/GYS1/HK2/LEF1/NFIL3/PFKP/PIK3R1/PIK3R3/PPP1R3C/PRKAA2/SHC4/SOCS1/SOCS3/SOCS4/TLR3
SBDS	other		#VALUE!	0.000239	CALB1/CRMP1/CTGF/CTH/DDIT3/FBXO32/GABBR2/ID1/MAFF/MYEF2/PCDH7/PPP1R15A/RGS4/TRIB3
TAF4B	transcription regulator		0.555	0.000239	CCND2/CTGF/INHA/INHBB/JUN/TGFB1/TNFAIP3
INSIG1	other		1.783	0.000246	ABCA1/ACACA/CXCR4/ELOVL6/FABP5/FASN/FDPS/GPAM/HMGCR/LDLR/LSS/PTGES/RAB27A/TGFB1/VNN1
WNT3A	cytokine		-0.077	0.000256	ACTA2/ATP1B1/CCND2/CTGF/CYR61/DDIT4/ETV5/ID1/IRX3/KCTD12/LEF1/MMD/SPRY1/TGFB1/TGFB2/THBS1/TIMP3/TRIB3
IL1B	cytokine		1.81	0.000262	A4GALT/ADAM8/ATF3/CCNJ/CDKN1A/Cdkn1c/CEBPG/CSRNP1/CXCR4/DDIT3/DDIT4/ERRFI1/FABP5/FKBP5/IBSP/IL1R1/JUN/LDLR/MYEF2/NFIL3/NR1H4/NR4A1/PTGDS/PTGES/PTGFR/PTX3/SERPINE1/SLC7A11/SOCS3/TGFB1/TIMP3/TLR3/TNFAIP3/TNFAIP6/TXNIP/UGCG/VCAM1/ZFP36
ARNT2	transcription regulator		#VALUE!	0.000269	PGK1/SLC2A1/SLC2A3
SERPINB5	other		#VALUE!	0.000269	CDKN1A/CDKN1B/KRT18
CKS2	kinase		#VALUE!	0.000269	CCNA2/CCNB1/CDK1
IL6	cytokine		0.187	0.00027	ABCA1/ANXA1/BIRC5/CDKN1A/CDKN1B/E2F4/ENO2/ID1/IL1R1/JUN/JUNB/LDLR/LIFR/MERTK/NAMPT/PPP1R15A/PTGES/PTGFR/RAB27A/RORA/SERPINE1/SLC39A14/SOCS1/SOCS3/TAP1/TFR2/TGFB1/THBS1/TLR3/VCAM1
FANCC	other		#VALUE!	0.000276	ANKRD6/ATP1B1/CDK1/CXCL12/IL1R1/MX1/NUAK1/OAS1/PTX3/RND3/SNX7/WWTR1
EGLN1	enzyme	Activated	-2.682	0.00028	ADM/ANGPT2/CDKN1B/CXCR4/EGLN3/PFKL/PGK1/SDC4/SLC2A1/TGFB1/TGFB2
ENG	transmembrane receptor		-1.497	0.000286	ACTA2/CTGF/H2AFX/ID1/SERPINE1/SMAD7/TGFB1/THBS1
SIRT1	transcription regulator		0.72	0.000288	ABCA1/ACD/APLN/BDNF/BIRC5/BNIP3/CCND2/CCNG2/CDKN1A/CDKN1B/CPT1A/CYP19A1/DBP/DHX58/ERO1A/FASN/FBXO32/GADD45A/HLA-DQB1/HMGCR/HMOX1/LDLR/NLGN2/NR1D1/OAS1/PC/TAP1/TBC1D8/ZEB1
TLR4	transmembrane receptor		1.056	0.000291	ATF3/CCND2/CERS6/CITED2/CYR61/FBXO32/FGL2/HMOX1/LZTFL1/MERTK/MX1/NR1H4/NR4A1/ORMDL1/PTGES/PTGFR/PTX3/SAP30/SGPL1/SLC7A11/SLCO3A1/SOCS1/SOCS3/TGFB1/TLR3/TNFAIP3/TNFRSF10A/TRAF6/UGCG/VCAM1
SKP2	enzyme		-0.194	0.000326	CCND2/CDKN1A/CDKN1B/PCNA/SKP2/SLC2A1
Rock	group		1.387	0.000326	ACTA2/CNN1/CTGF/TAGLN/TGFB1/THBS1
SPHK1	kinase		1.731	0.000331	ACTA2/CDKN1A/CTGF/IL33/SERPINE1/SOCS3/TAGLN
SMAD3	transcription regulator		1.414	0.000332	ACTA2/ANKRD1/ASPN/CCND2/CCNG2/CDKN1A/CTGF/CYP19A1/EREG/ESR1/INHA/JUN/JUNB/MBOAT2/PCNA/SERPINE1/SMAD7/TGFB1/TIMP3
IL15	cytokine		1.021	0.000338	ALDOA/CDKN1A/CDKN1B/CPT1A/CXCL12/ENO2/HK2/HMOX1/JUN/Klrk1/PFKFB3/PFKL/PFKP/PGK1/PIK3R1/PIK3R3/SLC16A3/SMAD7/TFRC/ZFP36
HDAC1	transcription regulator		0.518	0.000357	AKAP12/APAF1/BDNF/CCNB1/CCND2/CCNE2/CDC25A/CDC6/CDK1/CDKN1A/CDKN1B/DHFR/ESR1/FAM107A/GLUL/ID1/INA/MCM10/PFKFB3/PRAG1/RRM2/TNS1/TOP2A
SRF	transcription regulator	Inhibited	3.393	0.00036	ACTA2/ACTG2/AKAP12/ANKRD1/ANKRD6/ARHGAP20/CCDC174/CDKN1A/CLDN5/CNN1/CNN2/CTGF/CXCR4/G0S2/GTF2H5/JUNB/LMCD1/MINDY2/MYH11/MYL9/MYO1E/NR4A1/RND3/SLC2A1/TAGLN
MBTPS1	peptidase	Activated	-2.236	0.00037	ACACA/FASN/FDPS/HMGCR/LDLR
mir-145	microrna	Inhibited	2.202	0.00037	ABCA1/ACTA2/CCNA2/MYH11/TAGLN
TGFB1I1	transcription regulator	Inhibited	2.219	0.00037	CDKN1A/CDKN1B/ID1/SERPINE1/SMAD7
JUN	transcription regulator		0.229	0.000372	BDNF/C3AR1/CDK1/CDKN1A/CYP19A1/DROSHA/EREG/HLA-B/HMOX1/HNRNPA2B1/IBSP/JUN/JUNB/NR4A1/PTGDS/PTGES/PTX3/RARA/SERPINE1/SMAD7/SOCS3/SRSF2/TGFB1/TNFRSF10A/ZEB1/ZFP36
KLF5	transcription regulator		-0.563	0.000373	ACTA2/BIRC5/CDKN1A/CDKN1B/CPT1B/CXCR4/PTGES/TAGLN
HDAC6	transcription regulator		0.728	0.000373	BIRC5/CYP1B1/JUN/JUNB/SERPINE1/SRSF2/TGFB1I1/TGFBI
TXNIP	other	Inhibited	2.178	0.000373	CCNA2/CDKN1A/CDKN1B/DDIT4/FASN/G0S2/PCNA/TXNIP
NR3C1	ligand-dependent nuclear receptor		0.204	0.000381	ABCA1/ACTN1/ADM/AMIGO2/ANGPTL4/ANXA1/ATP1B1/BHLHE40/CDKN1A/CKAP2/CLDN5/CRABP2/CSRNP1/CXCR4/CYP19A1/CYR61/DDIT4/ELMOD2/ERRFI1/F2RL1/FASTKD5/FKBP5/GADD45A/GAS1/GLUL/IDH1/ING2/ING3/JUN/LRRC8A/MFSD2A/NAMPT/NFIL3/PAWR/PDCL3/PIK3R1/PIK3R3/PPP1R13L/PPP1R15A/SERPINE1/SERTAD2/SGPL1/SLC25A33/SLC7A6/THBS1/TIMP3/TIPARP/TNFAIP3/TNFAIP6/TNFAIP8/TNFRSF10A/TRIB3/UGCG/VCAM1
APOE	transporter		-0.44	0.000414	ABCA1/ACTA2/ATF3/ATXN3/CCND2/CPT1A/CTGF/CYR61/ESR1/F2RL1/FKBP5/GLUL/HMGCR/HMOX1/HPCAL1/JUN/LDLR/LIMS2/LRP8/MADD/PC/PHF21A/PTGES/PTX3/SDC4/SERPINE1/SOCS3/TGFB1/TRAF6/TXNIP/VCAM1
NOTCH1	transcription regulator		-0.076	0.00043	ACTA2/CCND2/CDKN1A/CDKN1B/Cdkn1c/ECT2/ENO2/HMOX1/LEF1/PRAG1/RND3/SOCS1/TAGLN/TGFB1/TGFB2/TGFBR3/WASF1
MITF	transcription regulator	Activated	-2.457	0.000446	CCNB1/CCNG2/CDCA8/CEP55/ECT2/FBXO32/HMBS/KIF20A/KIF4A/MCM6/NUF2/POLE2/RMI1/SERPINE1/SPAG5/SPC25/TXNIP/UPP1
GDF9	growth factor		1.937	0.00045	CTGF/CYP19A1/ID1/INHA/INHBB/KITLG/SMAD7
DDIT3	transcription regulator		0.895	0.000452	ANKRD1/ATF3/DDIT3/ERO1A/HMOX1/MYCBP/PPP1R15A/TNFRSF10A/TRIB3
ADRA1D	g-protein coupled receptor		#VALUE!	0.000452	BDNF/CCNB1/CDK1/CDKN1B/CREM/FABP5/JUN/NR4A1/PCNA
PTEN	phosphatase		0.907	0.000471	ACACA/ANGPT2/ATF3/BIRC5/CA2/CA8/CCNB1/CDC25A/CDKN1A/CDKN1B/CSTF3/ESR1/FASN/FGF23/G0S2/IDH3A/MKI67/PFKFB3/PIK3R1/PIM1/PRKAA2/SDC4/SKP2/SOCS3/VCAM1/VNN1
CYP7A1	enzyme	Activated	-2.449	0.000477	ABCA1/ACACA/FASN/FDPS/HMGCR/LDLR
TRIB3	kinase		-0.896	0.000477	CTH/DDIT3/DDIT4/PSAT1/STC2/TRIB3
DBI	other	Activated	-2	0.000517	ELOVL6/FASN/HMGCR/LSS
miR-221-3p (and other miRNAs w/seed GCUACAU)	mature microrna		-1.073	0.000517	CDKN1B/Cdkn1c/PIK3R1/TIMP3
RBCK1	transcription regulator		-0.152	0.000517	CCNB1/ESR1/TNFAIP3/VCAM1
FOXD3	transcription regulator		0.955	0.000517	CDKN1A/CXCR4/RND3/SKP2
DES	other		#VALUE!	0.000517	ANKRD1/KRT18/KRT8/TGFB1
PCGEM1	other		-0.227	0.000559	ACACA/ALDOA/CANT1/FASN/HK2/IDH1/LSS/PGK1/SLC2A1
DNMT1	enzyme		-0.14	0.000559	BIRC5/CDK1/CDKN1A/Cdkn1c/DLC1/ESR1/LRP8/SOCS1/VLDLR
MED1	transcription regulator	Activated	-2.534	0.000599	ACACA/BHLHE40/BIRC5/CCNB1/CCND2/CCNJ/CDC20/CDC6/CDK1/CDKN1A/CENPA/FASN/GADD45A/GHR/LEF1/PIM1/THBS1
IFI16	transcription regulator		1.342	0.000601	CDKN1A/DHFR/ESR1/OAS1/PCNA
PPARGC1B	transcription regulator		-0.647	0.00061	ACACA/CPT1B/CYCS/EGLN3/ERO1A/FASN/HK2/HMGCR
EIF2AK2	kinase		1.342	0.000667	BDNF/BHLHE40/CDKN1A/DDIT3/NEDD9/OAS1/PPP1R15A/SAMHD1/TNFAIP3/ZC3HAV1/ZNF292
MGEA5	enzyme		0.846	0.000683	ARHGAP29/ARHGEF25/C3AR1/CALB1/CAMK1D/CCNG2/CDKN1A/Cdkn1c/CMTM8/CNN1/FDPS/FLNB/GADD45A/GAS1/GLUL/GTF2IRD1/HIVEP2/HMGCR/HSD17B1/ICK/JUN/LSS/MAMLD1/NSDHL/PHKB/PIAS1/PIK3R1/PTGDS/RAB27A/SLC27A1/SOCS1/SOCS3/TGFB1/TGFBI/TGFBR3/THBS1/TIMP3/TSPAN12/WWTR1
ADRA1A	g-protein coupled receptor		#VALUE!	0.000686	BDNF/CCNB1/CDK1/CDKN1B/CREM/FABP5/JUN/NR4A1/PCNA
PDLIM2	other		-1.069	0.000712	CEMIP/CITED2/F2RL1/FXYD6/GHR/KCTD12/MYL9/NUDT11/SLC22A3/SRGAP1/STC2/TAGLN/TNS1/TXNIP
HOXA10	transcription regulator		-1.069	0.000712	ADM/Cdkn1c/CLDN5/DBP/GSTA3/HLA-DQB1/HMGCR/ID1/KLF10/NR4A1/PIK3R1/SLC27A1/TGFBR3/XDH
SYK	kinase		-0.025	0.000782	AKAP12/CDH12/CDKN1B/CITED2/CXCR4/FGL2/GADD45A/OAS1/PIM1/RASSF4/TGFB1
NOTCH3	transcription regulator		-0.555	0.000787	ACTA2/BIRC5/CDKN1A/DLGAP5/ID1/MYH11/PTX3
Lh	complex	Activated	-2.712	0.000794	ACTA2/ACTG2/ACTN1/AKAP12/CXCR4/CYP19A1/DHRS3/EREG/FKBP5/HK2/HSD17B1/INHA/INHBB/KRT18/MAP3K5/PAWR/PGK1/PTX3/RAB27A/RGS4/RGS7/THBS1/TK1/TNFAIP3/UPP1
POU2F1	transcription regulator		#VALUE!	0.000822	DDIT4/ESR1/GADD45A/H2AFX/IDH1/NXN/PRKAA2/PTGDS/PTGES/SLC7A11/TIMP3/TNFRSF10A
Akt	group		1.381	0.000823	ACTA2/ADM/ANKRD1/BIRC5/CDKN1A/CPT1A/CTGF/CXCR4/FKBP5/IL1R1/NFIL3/RDH10/RRM2/SERPINE1/THBS1/TIPARP/VCAM1
EP300	transcription regulator		0.6	0.000913	AKAP12/BIRC5/CA2/CCNG2/CDC25A/CDKN1A/CHKA/CRIM1/CXCR4/CYP19A1/DHRS3/FASN/GFRA1/HDAC11/HMGCR/ID1/JUN/MKI67/MMD/MSH2/NDRG1/RNF157/SDC4/SKP2/SLC27A1/SLC7A11/SOCS3/TANC2/TIPARP/TNFAIP3/WFS1
PIK3R1	kinase		-0.368	0.000913	CCND2/CDKN1B/DDIT3/DNAJC3/HMOX1/MKI67/PIK3R1/SLC2A1/TRIB3/TXNIP/VCAM1
BMP15	growth factor		-1.172	0.000924	EREG/ID1/PTX3/SMAD7/TNFAIP6
ACVRL1	kinase		0.072	0.000924	ANGPT2/ID1/SERPINE1/TAGLN/VCAM1
miR-21-5p (and other miRNAs w/seed AGCUUAU)	mature microrna		0.258	0.000924	APAF1/MSH2/PIK3R1/SMAD7/TIMP3
Rb	group		1.387	0.000957	CCNA2/CCNE2/CDC6/CDKN1A/DHFR/DUSP10/ECT2/PCNA
NSD2	enzyme		#VALUE!	0.000957	CA2/CCND2/CCNE2/CDC25A/CXCR4/GADD45A/JUN/OAS1
NELFE	other		-1.934	0.000981	CCNE2/DLGAP5/JUNB/TOP2A
Smad	complex		0.866	0.000981	ANGPTL4/CDKN1A/PTHLH/SERPINE1
USP19	peptidase		0.927	0.000981	ATXN3/BNIP3/DDIT3/FBXO32
LTBP4	growth factor		1.06	0.000981	GREM1/ID1/TGFB1/TGFB2
RLIM	enzyme		1.732	0.000981	CDKN1A/CTGF/SERPINE1/SMAD7
IL31	other	Inhibited	2	0.000981	CCNB1/CDK1/CDKN1B/JUNB
COL1A1	other		#VALUE!	0.000981	CDKN1A/CXCR4/PCNA/VCAM1
PDE3B	enzyme		#VALUE!	0.000981	FASN/SERPINE1/SOCS3/TRIB3
FOS	transcription regulator		1.454	0.001	APLN/BDNF/C3AR1/CA2/CRABP2/ELOVL6/EREG/FASN/HLA-B/HMOX1/IBSP/JUN/JUNB/KLF6/LRP8/LTBP3/NFIL3/NQO1/NR4A1/NSDHL/PIAS1/PTTG1/RARA/SERPINE1/SMAD7/SOCS3/TGFB1/TIPARP/UGCG/VCAM1/XDH/ZEB1
APOA1	transporter		-1.054	0.00102	ABCA1/CHKA/HMGCR/SLC2A1/TGFB1/VCAM1/XDH
SLC22A2	transporter		#VALUE!	0.00102	CPT1A/CPT1B/SLC22A5
FOXK2	transcription regulator		#VALUE!	0.00102	CDC14A/CDKN1B/SERPINE1
SLC22A1	transporter		#VALUE!	0.00102	CPT1A/CPT1B/SLC22A5
RAD51C	enzyme		#VALUE!	0.00102	ESR1/KRT18/KRT8
SOAT1	enzyme		#VALUE!	0.00102	DDIT3/FASN/HMGCR
URI1	transcription regulator		#VALUE!	0.00102	CCNB1/CDK1/FKBP5
S100A8	other		-1.606	0.00108	AKAP12/APLN/ATF3/BHLHE40/CCNE2/Cdkn1c/CPM/DDIT4/ETV5/HMOX1/IL33/NR1H4/PRSS12/PTGES/ROBO2/SOCS3/TNFAIP8/TXNIP/VCAM1
STAT3	transcription regulator		1.335	0.00117	ACTA2/BIRC5/CCNB1/CCND2/CDKN1A/CDKN1B/CHEK1/DDIT3/ECT2/ESR1/FASN/FGL2/GADD45A/HK2/HMOX1/JUNB/Klrk1/NAMPT/OAS1/PIM1/PTPN2/RAB27A/RORA/SERPINE1/SOCS1/SOCS3/STC2/TAGLN/TAP1/TLR3/ZFP36
SP3	transcription regulator		#VALUE!	0.00121	ABCA1/ACTA2/AKAP12/ANGPT2/ATF3/BIRC5/CDKN1A/CDKN1B/CITED2/ESR1/GHR/HSD17B1/JUN/LDLR/MAT2A/PGK1/PTTG1/SLC2A3
Igm	complex		#VALUE!	0.00121	BIRC5/CCNA2/CCND2/CDKN1A/CDKN1B/CYCS/PIM1/UGCG/ZFP36L1
RIPK2	kinase		1.504	0.00123	ABCA1/ACACA/FASN/HMGCR/IL33/LDLR/PTGES/RASGRP1/RASGRP3/SLC27A1/VCAM1
RB1	transcription regulator		1.778	0.00127	ALG5/ANGPT2/APAF1/ATP1B1/BIRC5/BNIP3/CCNA2/CCNB1/CCNE2/CDC25A/CDC6/CDK1/CDKN1A/CDKN1B/Cdkn1c/DHFR/EDNRA/ID1/KRT18/MCM6/PCLAF/PCNA/PIM1/PSEN2/RRM2/SRPRA/TGFB1/ZEB1
CTNNB1	transcription regulator		0.255	0.00128	ANXA1/BHLHE40/BIRC5/CCNA2/CCND2/CCNE2/CDKN1A/CDKN1B/Cdkn1c/CLDN5/CNN2/CRABP2/CTGF/CXCL12/CXXC4/CYP19A1/CYP1B1/CYR61/DDIT3/ENO2/GHR/GLUL/GNG10/GPAM/GREM1/IL1R1/INHBB/JUN/KIF23/LEF1/MMP16/NR4A1/RAB3A/RGN/SEMA5A/SERPINE1/SLC17A9/SLC39A14/SRSF1/TGFB1/TIMP3/TOB2/TRUB1/UGCG/VCAM1/ZEB1
SMARCA4	transcription regulator		0.457	0.00134	ABCA1/AHNAK/BEND5/BIRC5/CDC25A/CDC6/CDKN1A/CDKN1B/CPM/CTGF/DHFR/EDNRA/ELOVL6/EREG/FAM167A/FKBP5/FLNB/GADD45A/GYS1/HLA-B/HS3ST1/JUN/KRT18/LOXL2/MAFF/NECTIN1/Pdlim3/PKIA/PTHLH/PTX3/RAD1/SEMA7A/TAGLN/TAP1/TCIM/TGFB2/TMEM117/TNFAIP8/TPK1/TRIM36/TSPAN13/TWF1
BDNF	growth factor		#VALUE!	0.00134	BDNF/BHLHE40/CCND2/CDKN1A/Cdkn1c/CXCR4/ELOVL6/INHBB/KLF10/PFKFB3/PRSS12/RGS4/TBC1D8/THBS1/TIPARP
PTK2	kinase	Inhibited	2.195	0.00145	ACTA2/CDKN1A/CYR61/KRT18/KRT8/THBS1/TIMP3/VCAM1
LEP	growth factor		-0.473	0.00149	ACACA/ACTA2/ADAM8/ANGPTL4/APAF1/BDNF/CCNA2/CDKN1A/CDKN1B/CPT1A/CPT1B/CYR61/ELOVL6/FASN/GADD45A/GPAM/GSTA3/HMGCR/IDH1/JUN/LDLR/PCNA/SERPINE1/SLC27A1/SOCS3/TGFB1/TIMP3/TTPA/VCAM1
RNA polymerase II	complex		#VALUE!	0.00152	CCNB1/CCNE2/CDKN1A/CXCR4/CYP1B1/DLGAP5/ESR1/FANCI/GADD45A/GHR/ID1/JUN/JUNB/KPNA2/LDLR/MEF2A/NR1H4/PCNA/RND3/SLC36A4/SLC9A8/SOCS3/TAP1/TGFB1/TOP2A
SPARC	other	Inhibited	2.706	0.00162	BHLHE40/CPT1B/HIST1H3D/LRP8/MBD4/MCM6/MSH2/NDRG1/POLE/POLE2/SERPINE1/SLC22A5/SLC7A11/TGFB1
EZR	other		-1	0.00167	ATF3/DDIT3/DDIT4/EIF4EBP1/HNRNPA2B1/TRIB3
ERBB4	kinase		1.71	0.00167	BDNF/CXCL12/JUN/PGK1/SLC1A1/SLC2A1
HSD11B1	enzyme		#VALUE!	0.00167	ACACA/ANGPTL4/CPT1A/CPT1B/FASN/GPAM
CSF2RB	transmembrane receptor		1.067	0.00168	CCND2/JUN/JUNB/PIM1
RPL22	other		#VALUE!	0.00168	ATF3/CDKN1A/DDIT3/DNAJC3
DNMT3B	enzyme		-0.791	0.00173	CDK1/CDKN1A/CYP1B1/DDIT3/DLC1/EDNRA/ESR1/HLA-DQB1/JAKMIP2/LONRF1/MID1/MYL9/POLD4/PPP1R3C/PSEN2/PUSL1/RAB39B/RGS4
ATF6	transcription regulator		-1.633	0.00176	BUB1/CHKA/CPT1A/DDIT3/DNAJB11/FDPS/LMAN1/MANF
mir-8	microrna		-0.351	0.00185	ATF3/CDKN1A/DNAJC3/ERRFI1/RNF2/SCMH1/SKP2/TGFB2/ZEB1/ZFP36
ZFP36	transcription regulator		#VALUE!	0.00185	CCNE2/CDC6/CDKN1A/KNTC1/PIM1/SOCS1/SPRYD7/TFRC/VCAM1/ZFP36
STAT5A	transcription regulator		-1.97	0.00186	CCND2/CDKN1A/CDKN1B/CEMIP/CHEK1/CYP1B1/EGLN3/FASN/FKBP14/GADD45A/KLF10/Klrk1/LEF1/OAS1/PIM1/RORA/SLC2A10/SLC2A3/SOCS1/SOCS3/SYTL2/TGFBI/TSPAN13/TXNIP/ZFP36
GPER1	g-protein coupled receptor		-0.894	0.00193	CDKN1A/CTGF/CYP19A1/ESR1/FASN
CAMK4	kinase		1.172	0.00193	ABCA1/BDNF/FBXW7/JUN/JUNB
NPPB	other	Inhibited	2.216	0.00193	CYP19A1/GSTA3/HMGCR/LDLR/LSS
PPARD	ligand-dependent nuclear receptor		1.715	0.00197	ACTA2/ANGPTL4/BIRC5/CCND2/CDK1/CDKN1B/Cdkn1c/CPT1A/CPT1B/FASN/GPAM/MERTK/MFSD2A/PCNA/PDE4C/SLC22A3/SLC25A20/THBS1/VLDLR
ZBED6	other		0	0.00204	CRIM1/DDIT4/DLGAP5/KITLG/UPP1/WWTR1/ZEB1
LHCGR	g-protein coupled receptor		#VALUE!	0.00204	CYP19A1/ESR1/FSHR/HSD17B1/INHA/INHBB/TNFAIP6
estrogen receptor	group		0.286	0.00205	ABCA1/ANXA1/BDNF/CCND2/CCNE2/CDH12/CTGF/CXCL12/CXCR4/EREG/KLF10/KRT18/KRT8/LOXL2/NEDD9/PCDH7/SERPINE1/TGFB1/TGFB2/TGFBR3/TIMP3/ZEB1
CLOCK	transcription regulator		#VALUE!	0.00215	AK4/ANGPTL4/BHLHE40/CHTF8/DBP/DDIT3/ELOVL6/FASN/FKBP5/GADD45A/HLA-DQB1/HSPH1/ID1/JUNB/KIF20A/NFIL3/SLC30A5
LPIN1	phosphatase	Activated	-2.176	0.00218	ACACA/CDKN1A/CPT1A/FASN/FDPS/HMGCR
AGTR1	g-protein coupled receptor	Inhibited	2.183	0.00218	HMOX1/JUN/SERPINE1/TGFB1/TXNIP/XDH
Histone h4	group		#VALUE!	0.00242	AKAP12/CDC25A/CDC6/CDK1/CDKN1A/CYP19A1/DHFR/ESR1/FASN/GAS1/HPSE/MSH2/NLGN2/RRM2/SOCS3/TAGLN
Integrin	complex		#VALUE!	0.00243	ESR1/JUN/TGFB2
CTF1	cytokine		#VALUE!	0.00243	FASN/SOCS1/SOCS3
STRA6	transporter		#VALUE!	0.00243	RARA/SOCS3/TGFB1
RBX1	enzyme		#VALUE!	0.00243	BIRC5/CCNB1/CDK1
RBP4	transporter		#VALUE!	0.00243	ADCY6/RARA/TGFB1
ACE2	peptidase		#VALUE!	0.00243	ACTA2/BNIP3/SERPINE1
ACTG1	other		#VALUE!	0.00243	ACTA2/CNN1/TAGLN
Cox5b	other		#VALUE!	0.00243	CAPN6/MMP16/TGFB2
IFNG	cytokine		1.005	0.00245	ABCA1/ACTA2/ADM/ATF3/ATP1B1/BDNF/CCNA2/CCND2/CDKN1A/CERS6/CREM/CTGF/CXCL12/CXCR4/DDIT3/EDNRA/F2RL1/FAM107A/FGL2/GLUL/GPR85/HK2/HLA-B/HLA-DQB1/JUN/JUNB/KCTD12/KLF6/LIFR/MX1/OAS1/PCDH17/PFKFB3/PIM1/PTGES/PTHLH/PTX3/RGN/SAMHD1/SBNO2/SDC4/SEMA7A/SLC16A3/SLC2A1/SLC7A11/SOCS1/SOCS3/TAP1/TGFB1/TGFBR3/THBS1/TIMP3/TLR3/TXNIP/VCAM1
NFkB (complex)	complex		1.596	0.00251	BLVRA/CALB1/CCNB1/CDKN1A/CREM/CTGF/CXCL12/CXCR4/DBP/DDIT3/FABP5/G0S2/HMOX1/JUNB/KDM2A/MSH2/NAMPT/NR1D1/PTGES/SDC4/SLC11A2/SLC16A3/SLC2A1/SMAD7/SOCS1/SOCS3/TAP1/TFRC/TGFB1/TNFAIP3/TNFAIP8/TRIB3/VCAM1
SHC1	other		0.558	0.00253	CDKN1A/CDKN1B/HS3ST1/MEF2A/NQO1/PCNA/SDC4/SHC4
MET	kinase		-0.817	0.00263	CCND2/CDK1/CDKN1A/CDKN1B/CITED2/FGL2/HMOX1/MERTK/PIM1/SLCO3A1/SOCS3/TLR3
MECP2	transcription regulator		0.928	0.00263	ANXA1/BDNF/EFNA5/ESR1/FKBP5/GABBR2/INA/JUNB/NR4A1/RAB39B/SCN3A/SLC2A3
NELFB	other	Activated	-2	0.00265	ATF3/CDKN1A/CTGF/GADD45A
SMURF2	enzyme		-1.964	0.00265	CTGF/JUN/SERPINE1/SMAD7
ADRB	group		0	0.00265	BDNF/CREM/JUN/JUNB
ADAM12	peptidase		1.057	0.00265	CDKN1B/IL33/JUNB/SERPINE1
FH	enzyme		#VALUE!	0.00265	AATF/CDKN1A/HMOX1/NQO1
E2F5	transcription regulator		#VALUE!	0.00265	DHFR/DUSP10/SERPINE1/VEGFB
ZBTB33	other		#VALUE!	0.00265	APAF1/CDKN1A/PGK1/TNFRSF10A
ZBTB17	transcription regulator		#VALUE!	0.00265	CDKN1A/DDIT3/JUN/SOCS1
Nr1h	group		-1.672	0.00265	ABCA1/ACACA/ATP1B1/CCND2/EDNRA/ELOVL6/FASN/GPAM/MERTK/PTGES/RGN/SBNO2/TAP1/THBS1/TIMP3/VLDLR
DCAF1	kinase		-0.277	0.00267	CDKN1A/KLF10/PTGES/SOCS3/TXNIP
SKI	transcription regulator		0	0.00267	ACTA2/CDC25A/CDKN1A/SERPINE1/SMAD7
FDFT1	enzyme		1.387	0.00267	ABCA1/CIDEB/FASN/FDPS/HMGCR
CTBP1	enzyme		#VALUE!	0.00267	ACKR3/CCNG2/CDKN1A/KRT8/MMD
ARNTL	transcription regulator		-0.785	0.00278	ACACA/DBP/ELOVL6/FASN/GPAM/NR1D1
TP73	transcription regulator		0.83	0.00302	ACTA2/ANGPTL4/ATF3/BHLHE40/BIRC5/CCNG2/CDK1/CDKN1A/CDKN1B/CITED1/CTH/CYR61/DBP/DDIT3/DDIT4/DHFR/DHRS3/DIMT1/EREG/FASN/HAGH/HPSE/PIK3R3/SERPINE1/TGFB1/TGFB2/THBS1/TIMP3/TNFRSF10A
S100A9	other		-1.213	0.00303	AKAP12/APLN/ATF3/BHLHE40/CCNE2/Cdkn1c/CPM/DDIT4/ETV5/IL33/NR1H4/PRSS12/PTGES/ROBO2/SOCS3/TNFAIP8/TXNIP
CREBBP	transcription regulator		0.425	0.00305	AKAP12/BIRC5/CA2/CCND2/CDC6/CDKN1A/CDKN1B/CRIM1/CXCL12/CXCR4/CYR61/DHFR/DHRS3/GFRA1/HDAC11/JUN/MSH2/MYCBP/NDRG1/NR4A1/PCNA/RNF157/SDC4/SLC7A11/SOCS3/TAGLN/TANC2/TIPARP/TNFAIP3/WFS1
IDH1	enzyme		#VALUE!	0.00307	DDIT3/FASN/PGK1/PPP1R15A/SLC2A1/TGFB2/ZEB1
LDL	complex		1.247	0.00324	ABCA1/CREM/CTGF/DDIT3/NAMPT/SERPINE1/SOCS1/SOCS3/TGFB1/VNN1
IL4	cytokine		1.48	0.00326	ACTA2/AHNAK/CCND2/CDKN1A/CDKN1B/CITED2/CPEB3/CXCR4/DHODH/FAM162A/FASN/FLNB/GBE1/GCN1/HMGCR/IL1R1/JUN/KITLG/KLF6/Klrk1/LIFR/NABP1/NDRG1/NEDD9/NFIL3/PFKL/PFKP/PIM1/POLE2/PTHLH/SKA1/SLC2A1/SOCS1/SOCS3/SRM/TGFB1/VARS/VCAM1
HOXC8	transcription regulator		-0.816	0.00351	ANKRD1/CNN1/GAS1/NQO1/SLC16A3/TAGLN
TFAM	transcription regulator		-1.342	0.00358	FABP5/PFKP/PGAM1/PGK1/SLC25A20
Mek	group		-1.192	0.00368	CCND2/CDKN1A/CDKN1B/EREG/ESR1/ETV5/FASN/ID1/JUN/LRP8/MAFF/POLR3G/PUS7/RND3/SEMA6A/SERPINE1/SPRY1/TNFAIP3/ZEB1
EP400	other	Activated	-2.596	0.00371	CCNA2/CDC20/CDC25A/CDC6/CDKN1A/SKA1/SKP2
NTRK2	kinase		-1.947	0.00371	CCNA2/CCNE2/CDC6/CDCA8/CDK1/PCNA/RAB3A
TLR7/8	group		0.378	0.00371	CA2/EREG/PPP1R15A/SLC7A11/TNFAIP3/TNFAIP6/TRIB3
ABCA1	transporter		1.324	0.00371	ABCA1/ANXA1/CPT1A/HMGCR/LDLR/NAMPT/SLC2A1
SETD2	enzyme		#VALUE!	0.00371	CITED2/CTGF/CYR61/GJA4/JUN/SERPINE1/VEGFB
ATF3	transcription regulator		0.692	0.00372	ATF3/CDK1/ID1/JUN/LDLR/MSH2/PPP1R15A/PTGES/SERPINE1
MEF2C	transcription regulator		#VALUE!	0.00372	ATF3/BDNF/CDKN1A/IBSP/JUN/JUNB/MEF2A/NR4A1/ZFP36
BRD7	transcription regulator		0.689	0.00395	CDKN1A/ESR1/KRT8/NDRG1
TNFAIP2	other		1	0.00395	CITED2/FGL2/MERTK/SLCO3A1
CDK2	kinase		#VALUE!	0.00395	CDKN1A/H2AFX/PCNA/TNFAIP3
CBX3	transcription regulator		#VALUE!	0.00395	BIRC5/CDC25A/CDK1/CDKN1A
HDAC4	transcription regulator		-0.391	0.0041	ATF3/BDNF/CALB1/CCNB1/CDKN1A/NETO1/NR4A1/RGS4/RGS7/SLC2A1/TSPAN13/VCAM1
MAGEA11	other		#VALUE!	0.00417	CDKN1B/FKBP5
ACER3	enzyme		#VALUE!	0.00417	ACER2/CDKN1A
CSRP3	other		#VALUE!	0.00417	KRT18/KRT8
ATP1A1	transporter		#VALUE!	0.00417	HMGCR/LDLR
SYNM	other		#VALUE!	0.00417	CDKN1A/CDKN1B
TIAM1	other		#VALUE!	0.00417	JUN/LEF1
SLC3A2	transporter		#VALUE!	0.00417	ANKRD1/CTGF
EFEMP1	enzyme		#VALUE!	0.00417	SERPINE1/SMAD7
PCBP2	other		#VALUE!	0.00417	CTGF/CYR61
TAPBP	transporter		#VALUE!	0.00417	HLA-B/TAP1
ZFYVE16	transporter		#VALUE!	0.00417	CDKN1A/SERPINE1
NR5A2	ligand-dependent nuclear receptor		0.001	0.00419	CDKN1A/CYP19A1/FASN/HMGCR/INHA/JUN/JUNB/LDLR/NR1H4/PTGDS
CHUK	kinase		-1.025	0.0043	ACKR3/CCNB1/CDC25A/CXCL12/EREG/HK2/JUNB/LIFR/MAT2A/PCDH7/PCNA/PTX3/SOCS3/TK1/TLR3
Gm-csf	group		0.268	0.00445	BIRC5/CCND2/JUN/JUNB/PIM1/SOCS3/TGFB1
SMARCB1	transcription regulator		0.936	0.00446	BNIP3/CA8/CCNA2/CDC6/CDKN1A/CIDEB/MX1/OAS1/PC/PPP1R3C/SKP2
KDM3A	transcription regulator		#VALUE!	0.00463	ADM/HMOX1/SERPINE1
CERS2	transcription regulator		#VALUE!	0.00463	CDKN1A/CERS6/DDIT3
WDFY2	other		#VALUE!	0.00463	CYCS/FASN/SLC2A1
PCM1	other		#VALUE!	0.00463	CDKN1A/MKI67/PCNA
BHLHE41	transcription regulator		#VALUE!	0.00463	ANGPTL4/CA9/HK2
FBN1	other	Activated	-2.219	0.00469	CTGF/CYR61/LTBP3/SERPINE1/TIMP3
RAD21	transcription regulator		#VALUE!	0.00469	BDNF/CCNG2/CXCL12/HLA-DQB1/THBS1
OSM	cytokine		1.068	0.00475	ACTA2/ANGPT2/CDKN1A/FASN/LDLR/LIFR/PTGES/SOCS3/TIMP3/VCAM1
ERK	group	Inhibited	2.135	0.00484	CDKN1A/CDKN1B/CTGF/EREG/ESR1/HMOX1/JUN/JUNB/KLF10/NDRG1/PTGES/SERPINE1/SLC2A1/THBS1/UGCG/ZFP36
STAT5a/b	group		-0.114	0.00491	CCND2/CDC25A/CDKN1A/CDKN1B/MMD/NETO2/PIM1/RARA/SLC2A3
KCNE3	ion channel		#VALUE!	0.00491	CA8/CHKA/CSRNP1/FABP5/IBSP/NFIL3/NR4A1/Sik1/TNFAIP6
E2F6	transcription regulator		#VALUE!	0.00491	CDC25A/CDC6/EFNA5/KDM3A/PCLAF/RECQL/RRM2/SERPINE1/SRSF1
MAPK9	kinase		-0.958	0.0051	ACACA/CDKN1A/CDKN1B/FASN/FGL2/JUN/JUNB/KLF6/LUC7L3/PPP1R15A/PTGES/PTX3/TLR3/TNFAIP3/ZFP36
RELA	transcription regulator	Inhibited	2.501	0.00511	ANKRD1/BHLHE40/BIRC5/CDKN1A/CITED2/CXCR4/CYP19A1/DDIT3/HMOX1/JUN/KRT18/KRT8/MAT2A/NAMPT/NR4A1/PTGDS/PTX3/SDC4/SMAD7/TAP1/TGFB1/TNFAIP3/VCAM1
ESRRG	ligand-dependent nuclear receptor		0.291	0.0053	CDKN1A/CDKN1B/CYCS/CYP19A1/FBXO32/HK2/VEGFB
ADRA1B	g-protein coupled receptor		#VALUE!	0.0053	BDNF/CDKN1A/CDKN1B/CREM/FABP5/JUN/NR4A1
GH1	growth factor		0.108	0.00538	ATF3/GHR/JUN/LDLR/SOCS3/ZFP36
MYOC	other		0.152	0.00557	ANXA1/CA2/DDIT3/DDIT4/FBXO32/RHBDF1/SLC2A3/SLC7A11/STC1/STC2/UPP1
CEBPD	transcription regulator	Inhibited	2.386	0.00561	BIRC5/CCNB1/CDKN1B/CXCR4/CYP19A1/DDIT3/FBXW7/SLC5A8/VLDLR
FOXF2	transcription regulator	Activated	-2	0.00563	ACTA2/ACTG2/MYH11/TAGLN
HEXIM1	transcription regulator		-1.987	0.00563	ANXA1/LOXL2/SLC2A1/TGFB2
FABP2	transporter		-0.927	0.00563	ABCA1/CPT1A/FASN/HMGCR
CYP51A1	enzyme	Inhibited	2	0.00563	HMGCR/LSS/NSDHL/RARA
TRAF3	enzyme	Activated	-2.121	0.00564	ADM/CHKA/CXCL12/NDRG1/RHBDF1/SNRNP25/TK1/TNFAIP3
TGFBR2	kinase		1.544	0.00572	ACTA2/ANGPTL4/BDNF/CCT5/CDKN1A/CDKN1B/CTGF/JUN/PTHLH/SERPINE1/SLC2A3/SMAD7/SOCS3/TGFB1/TGFB2/TXNIP/ZNF365
mir-17	microrna		0.492	0.00604	CAPRIN2/CDKN1A/CTGF/H2AFX/TXNIP
E2F2	transcription regulator		#VALUE!	0.00604	CDC25A/CDC6/CDK1/DHFR/SERPINE1
ID2	transcription regulator		0.156	0.00614	CCNB1/CCND2/CCNE2/CCNG2/CDC6/CDK1/CDKN1A/Cdkn1c/CXCR4/DUSP10/KLF6/NR4A1/PIK3R1/RORA/SEMA3F/SMAD7/SOCS3/TGFBR3
Creb	group		-0.714	0.00617	ADM/BDNF/C3AR1/CDKN1A/CREM/CTH/CYP19A1/ETV5/FLNB/GPR50/GPR85/LDLR/LTBP3/NEDD9/PGK1/PHTF1/POLE/PRKAA2/SESN3/SLC7A11/TIA1
KLF15	transcription regulator		-0.257	0.00626	CPT1B/CTGF/FABP5/FASN/GPAM/SLC25A20/SLC27A1
ELK1	transcription regulator		0.314	0.00626	CDKN1A/JUNB/SLC2A1/SLC7A11/TAGLN/THBS1/TIPARP
LIPE	enzyme		#VALUE!	0.00635	ANKRD1/ATF3/CA2/CITED2/FASN/FKBP5/G0S2/KITLG/NR4A1/PC/RARA/SDC4/SMAD7/ST8SIA4
ALDH1A2	enzyme		-1.664	0.00655	ATF3/CTGF/CYR61/HOXA4/TGFBI/TIMP3
LPL	enzyme		-0.97	0.00655	CPT1A/LDLR/SLC27A1/SLC2A1/TGFB1/THBS1
CD24	other	Activated	-3.153	0.00663	ASPM/ATF3/CDKN1A/DEPDC1/KIF18A/KNTC1/PHF10/PPP1R15A/SFPQ/SMC4/THBS1/TOP2A/TPP2
ADIPOQ	other		0.229	0.00682	ACACA/BIRC5/CDKN1A/CDKN1B/CYP19A1/FASN/HMOX1/Klrk1/SLC27A1/SLC2A3/TGFB1/VCAM1
DICER1	enzyme		-0.222	0.00721	ANGPT2/ANGPTL4/BDNF/CCND2/CDKN1A/CDKN1B/Cdkn1c/CXCR4/CYR61/HMGCR/JUN/Klrk1/LHFPL6/PELI2/PIK3CG/RASGRP1/SERPINE1/SOCS3/THBS1/TIA1
HIC1	transcription regulator		-0.423	0.00723	ACKR3/ACTA2/AMIGO2/CA2/CCNE2/LRP8/SLC7A11/SNAPC1/TNFAIP8
MAP2K1	kinase		-0.295	0.00723	ATF3/CDKN1A/CDKN1B/CTGF/ENO2/ETV5/JUN/PCNA/PIM1
GPS2	transcription regulator		-0.239	0.00735	ABCA1/CDKN1A/DHRS3/HEBP1/HIVEP2/IDH1/SOCS1
TRAF2	enzyme	Activated	-2.157	0.00748	ADM/CCNB1/CDK1/CHKA/NDRG1/RHBDF1/SNRNP25/TK1
MLXIPL	transcription regulator	Activated	-2.186	0.00763	ACACA/CPT1A/ELOVL6/FASN/TXNIP
MMP2	peptidase		-1.477	0.00763	CDKN1A/CLDN5/PIAS1/SOCS1/TGFB1
IPMK	kinase	Inhibited	2.2	0.00763	ACTA2/CYR61/JUN/JUNB/MYL9
SCARB1	transporter	Inhibited	2.2	0.00763	DDIT4/FASN/FBXO32/HMGCR/LDLR
MFSD2A	transporter		#VALUE!	0.00763	FASN/HK2/IDH1/LDLR/LSS
HGF	growth factor		-1.499	0.00767	ACTA2/CA9/CCNG2/CDKN1A/CGRRF1/CTGF/MERTK/PCNA/PGAM1/PGK1/PTPN2/SLC9A3R1/TGFB1/THBS1/VCAM1
PNPLA8	enzyme		#VALUE!	0.00772	FBXO32/HMOX1/NQO1
Pka catalytic subunit	group		#VALUE!	0.00772	ABCA1/INHA/NR4A1
TRIB1	kinase		#VALUE!	0.00772	ACACA/CPT1A/FASN
mir-221	microrna		#VALUE!	0.00772	CDKN1B/Cdkn1c/PIK3R1
miR-143-3p (and other miRNAs w/seed GAGAUGA)	mature microrna		#VALUE!	0.00772	PRC1/TAGLN/TOP2A
FOXF1	transcription regulator		#VALUE!	0.00772	ACTG2/MYH11/VCAM1
RECK	other		#VALUE!	0.00772	CDKN1A/CDKN1B/SKP2
mir-515	microrna		-0.927	0.00772	ANGPTL4/PTHLH/SERPINE1/ZEB1
FUT8	enzyme		-0.218	0.00772	CYP1B1/GAS1/SMAD7/TFRC
RARRES2	transmembrane receptor		0.068	0.00772	CCNA2/CCND2/CYP19A1/FASN
RASSF1	other		1.02	0.00772	CCNA2/CDKN1A/ESR1/MAP3K5
SMC3	other		#VALUE!	0.00772	CCNG2/CXCL12/HLA-DQB1/THBS1
CCND3	kinase		#VALUE!	0.00772	CCND2/CDC6/CDK1/CDKN1B
KAT2A	enzyme		#VALUE!	0.00772	BNIP3/CCND2/FBXO32/TNFRSF10A
MSTN	growth factor		1.698	0.00789	ACTA2/CDKN1A/FBXO32/INHBB/SLC2A1/TGFB1
PTH	other		1.961	0.00816	CDKN1A/CDKN1B/CREM/CXCL12/CXCR4/FGF23/JUN/SDC4/SOCS3
HNF4A	transcription regulator	Inhibited	2.691	0.00836	ACOX2/AHNAK/BET1/CCNA2/CCNB1/CCNE2/CDK1/CDKN1A/Cdkn1c/CRABP2/FUT11/FXYD6/HLA-B/KRT8/MS4A8/NR1H4/PCNA/PNP/PTGDS/RARA/RASGRP3/RORA/SBNO2/SLC25A20/SLC26A11/TFR2/TFRC/TIMP3/TNFAIP6/ZFP36
EHF	transcription regulator		0	0.00843	ANGPTL4/CDK1/CDKN1B/CRABP2/EREG/HIST1H4H/HMOX1/SERPINE1/VNN1/ZFP36L1
LDLR	transporter		#VALUE!	0.0093	ABCA1/ACACA/DDIT3/ELOVL6/FASN/GJA4/GPAM/HMGCR/LDLR/VCAM1/VLDLR
SAMSN1	other		0	0.00938	CCND2/CITED2/FGL2/LZTFL1/MERTK/SAP30/SLCO3A1/SOCS1/SOCS3/TLR3
TCOF1	transporter		#VALUE!	0.00938	ADM/AK4/ANKRD10/BNIP3/EGLN3/MBOAT2/NDRG1/PPRC1/RMI1/SLC2A1
IRS2	enzyme		-1.73	0.00941	ACACA/CDKN1B/FASN/HMGCR/MX1/SLC2A1
HDAC5	transcription regulator		#VALUE!	0.00941	CDKN1A/CPT1B/HK2/KLF6/NR4A1/PFKL
KEAP1	transcription regulator		0	0.00949	GBE1/HMOX1/NQO1/TOP2A/VCAM1
Gsk3	group		-0.922	0.00975	DDIT3/ESR1/FASN/HMGCR/JUN/LDLR/NR4A1/TNFAIP3
EFNA2	kinase		1.134	0.00975	BDNF/CRABP2/CTGF/ETV5/FABP5/KRT18/NFIL3/PTHLH
PRKAG3	other		#VALUE!	0.00975	ANKRD1/ATP1B1/Cdkn1c/GBE1/LMCD1/SLC2A1/SLC2A3/XPR1
SOCS3	phosphatase		-0.479	0.00994	ATF3/FASN/MX1/OAS1/SOCS1/TGFB1/TRAF6
TOB1	transcription regulator		0.6	0.00994	AMOTL2/CCNA2/CDKN1A/CHEK1/MIS18BP1/MKI67/SPDL1
EFNA5	kinase		0.816	0.00994	BDNF/CRABP2/CTGF/ETV5/FABP5/KRT18/PTHLH
ID3	transcription regulator		1	0.0101	CCNB1/CCND2/CCNE2/CCNG2/CDC6/CDK1/CDKN1B/Cdkn1c/CXCR4/DUSP10/KLF6/NR4A1/PIK3R1/RORA/SMAD7/SOCS3/TGFBR3
TET2	enzyme		1.732	0.0102	ADAM8/AHNAK/BHLHE40/CA8/FAM129B/FGL2/HOXA4/IL1R1/LHFPL6/MAFF/PPP1R13L/PXDC1/RND3
PRKACA	kinase		-1.103	0.0103	CCND2/CDKN1B/Sik1/VCAM1
ACVR1	kinase		-0.555	0.0103	EGLN3/IBSP/ID1/SERPINE1
BACH1	transcription regulator		-0.187	0.0103	CXCR4/HMOX1/NQO1/SLC7A11
CDK5	kinase		0.832	0.0103	BDNF/CDKN1A/JUN/TNFAIP3
OSBPL8	transporter		1.114	0.0103	ABCA1/ACACA/DDIT3/HMGCR
ELOVL5	enzyme		1.98	0.0103	ACACA/ELOVL6/FASN/GPAM
ROR2	kinase		-1.265	0.0104	BIRC5/CCND2/CDC20/CDC25A/CDKN1A/CDKN1B/SLC17A9/SLC39A14/SMC1A/TRUB1
PLA2G10	enzyme		1.134	0.0104	DHRS3/KPNA2/KRT18/KRT8/LEF1/MKI67/NABP1/PPP1R10/SRM/ZCCHC7
mir-21	microrna		-0.502	0.0108	ACTA2/CDKN1A/DBP/DHX58/FGL2/Klrk1/MSH2/SMAD7/SPRY1/TAP1/TGFB1/TIMP3
Map3k7	kinase	Inhibited	2.157	0.0111	BHLHE40/FASN/FGL2/GAS1/JUN/MLLT3/TLR3/VCAM1
VHL	transcription regulator		-0.156	0.0111	BNIP3/CDKN1A/CDKN1B/PTHLH/SLC2A1/TFRC
LGALS1	other		1.044	0.0111	ACTA2/CCND2/CDKN1A/CDKN1B/PTX3/SERPINE1
KAT6A	enzyme		0.478	0.0115	CDC6/CDCA8/CDKN1A/HOXA4/HOXC4/HOXC6/SKP2
HMOX1	enzyme		0.283	0.0115	ANGPT2/APAF1/H2AFX/HMOX1/ID1/TGFB1/TGFB2/THBS1/VCAM1
CARM1	transcription regulator		1.176	0.0116	CDKN1A/DHFR/GADD45A/PTGES/STC2
Cdkn1c	other		#VALUE!	0.0116	CCNA2/CDC6/CDKN1A/CDKN1B/CXCR4
EPHB1	kinase		#VALUE!	0.0118	JUN/JUNB/SERPINE1
Mir218	microrna		#VALUE!	0.0118	CXCR4/IBSP/LEF1
MEMO1	other		#VALUE!	0.0118	CA2/JUN/STC2
mir-150	microrna		#VALUE!	0.0118	CLDN5/CXCR4/SLC2A1
RB1CC1	other		#VALUE!	0.0118	CDKN1A/SERPINE1/SMAD7
GTF2I	transcription regulator		#VALUE!	0.0118	CDKN1A/CDKN1B/THBS1
CRTC1	transcription regulator		#VALUE!	0.0118	BDNF/NEDD9/NQO1
HBB	transporter		#VALUE!	0.0118	SERPINE1/TGFB1/VCAM1
RFWD2	enzyme		#VALUE!	0.0118	ACACA/ETV5/TRIB3
CCAR2	peptidase		#VALUE!	0.012	NR1D1/SLC36A4
DUB	group		#VALUE!	0.012	ABCA1/LDLR
nicotinic acetylcholine receptor	complex		#VALUE!	0.012	JUN/JUNB
ZFAS1	other		#VALUE!	0.012	MMP16/ZEB1
G protein beta gamma	complex		#VALUE!	0.012	CTGF/CYR61
DESI2	other		#VALUE!	0.012	CDC25A/CDKN1A
OLFM2	other		#VALUE!	0.012	MYH11/TAGLN
PTPMT1	phosphatase		#VALUE!	0.012	CDKN1A/CDKN1B
ZNF451	enzyme		#VALUE!	0.012	CDKN1A/SERPINE1
TRA2B	other		#VALUE!	0.012	NQO1/RGS4
GSTA4	enzyme		#VALUE!	0.012	CCNB1/CDK1
NCK1	kinase		#VALUE!	0.012	DDIT3/PPP1R15A
SDHA	enzyme		#VALUE!	0.012	HMOX1/SLC2A1
RHOH	enzyme		#VALUE!	0.012	CDKN1A/CDKN1B
BCAR1	enzyme		#VALUE!	0.012	CDKN1A/ESR1
FLOT1	other		#VALUE!	0.012	CDKN1A/CDKN1B
N4BP1	other		#VALUE!	0.012	JUN/JUNB
SOD3	enzyme		#VALUE!	0.012	CA9/HPSE
VLDLR	transporter		#VALUE!	0.012	ABCA1/SLC2A1
FBXL5	enzyme		#VALUE!	0.012	SLC11A2/TFRC
AIP	transcription regulator		#VALUE!	0.012	BIRC5/CYP1B1
PINK1	kinase		#VALUE!	0.012	BNIP3/SLC2A1
Yap1	transcription regulator		#VALUE!	0.012	MYH11/TAGLN
DACH1	transcription regulator		#VALUE!	0.012	JUN/SERPINE1
ELOA	transcription regulator		#VALUE!	0.012	ATF3/CDKN1A
BUB1B	kinase		#VALUE!	0.012	CDC20/PTTG1
BRD4	kinase		-1.363	0.0123	BHLHE40/CCND2/CDC25A/CDKN1B/CXCR4/HMOX1/NQO1/PIM1/POLE2/POLR3G/SRM
Interferon alpha	group		0.599	0.0125	A4GALT/ANKRD10/ATF3/CDC25A/CDKN1A/CTH/DDIT4/DHX58/GPR180/MX1/NABP1/NFIL3/OAS1/PTGES/PTHLH/SLC2A3/SOCS1/SPRY1/TAP1/TGFB1/TLR3
NR4A1	ligand-dependent nuclear receptor		-0.89	0.0128	ACACA/ADM/BIRC5/CRABP2/DDIT3/FASN/G0S2/HMOX1/KRT18/KRT8/MAT2A/PTGDS
FGF21	growth factor		-0.928	0.0131	ACACA/CPT1A/CPT1B/FASN/GHR/SLC2A1
MTORC1	complex		1.099	0.0131	FASN/FDPS/HK2/HMGCR/NFIL3/PFKP/SLC2A1
ZMPSTE24	peptidase		#VALUE!	0.0131	ATF3/CDKN1A/DDIT4/GADD45A/GHR/SOCS1/SOCS3
CYB5R4	enzyme		-1.236	0.0133	ATF3/DDIT3/FASN/HMOX1
UBE3A	enzyme		-0.924	0.0133	CDKN1A/ESR1/RNF2/SERPINE1
NOX4	enzyme		0	0.0133	CDKN1A/H2AFX/SERPINE1/SLC2A1
NCF1	enzyme	Inhibited	2	0.0133	ACTA2/CDKN1A/SERPINE1/TGFB1
HELLS	enzyme		#VALUE!	0.0133	CCNA2/CCNB1/CDC6/PCNA
MAPK8	kinase		0.087	0.0135	CDKN1A/CDKN1B/CYP19A1/HMOX1/JUN/KLF6/PTGES/PTX3/RARA/TNFAIP3/ZFP36
CDKN1B	kinase		1.286	0.0135	B4GALT5/CCT6A/CDC25A/CDKN1A/LEF1/MMP16/PCNA/RAB3A/SKP2/SMAD7/TK1
GATA1	transcription regulator		0	0.0139	ACTN1/ANGPT2/BIRC5/FSD1L/GUCY1B3/HPSE/INHA/MAP3K5/NFIL3/PIM1/TFRC/TGFB1I1
MAPK14	kinase		1.102	0.0139	ABCA1/CCNA2/CCNB1/EREG/FASN/FDPS/GREM1/HMGCR/JUN/KITLG/LEF1/ZFP36
EIF4E	translation regulator		-0.277	0.014	BIRC5/BNIP3/CDKN1A/EREG/HMOX1/ILF2/NEDD8/NHP2/PCNA/POP7/SKP2/SNRPA/TRIP6/UPP1
SOCS1	other		1.237	0.014	CCND2/CDKN1A/FKBP5/MAP3K5/MX1/OAS1/SOCS1/SOCS3/TLR3/VCAM1
ITGB1	transmembrane receptor		-0.479	0.014	ACTA2/CDKN1A/CDKN1B/GAS1/JUN/JUNB/TGFB1/THBS1
CYP19A1	enzyme		-0.314	0.014	ACACA/BDNF/ESR1/FASN/HSD17B1/PCNA/SSTR1/SSTR3
NEUROG1	transcription regulator		0	0.014	AMIGO2/CCND2/CEMIP/GFPT2/GREM1/HIST1H4F/RIPOR2/THBS1
ABCB4	transporter	Activated	-2.201	0.0141	ACTA2/CTGF/SERPINE1/TGFB1/TGFB2
YBX1	transcription regulator		#VALUE!	0.0141	ACTA2/ID1/SLC2A3/STC2/TGFB1
SND1	enzyme		#VALUE!	0.0141	ANGPTL4/CDC6/DHFR/EREG/ID1
Vegf	group		0.853	0.0142	ACTA2/BIRC5/CA2/CALB1/CNN1/INHBB/LEF1/PC/XDH
CTGF	growth factor		1.775	0.0142	EGLN3/ESR1/FLNB/JUN/KITLG/LTBP3/PTGFR/SERPINE1/TIMP3
PRKCE	kinase		0.734	0.015	AMIGO2/BIRC5/CDKN1A/CYR61/JUNB/PIM1/VCAM1
SIRT6	enzyme		1.387	0.015	BIRC5/DBP/ELOVL6/FASN/HMGCR/LSS/LYPLA1
ERN1	kinase		0.076	0.0152	ACACA/ATF3/CDH6/CYP1B1/DDIT3/DNAJB11/DNAJC3/ERO1A/FITM2/JUN/SCN3A/SRPRA/WFS1
MAVS	other		-0.896	0.0152	DHX58/MAT2A/OAS1/SOCS1/SOCS3/ZC3HAV1
H2AFY	other		-0.816	0.0152	CCND2/CDKN1A/CITED2/GADD45A/ID1/SERPINE1
MED13	transcription regulator		#VALUE!	0.0152	ACACA/ELOVL6/FASN/GYS1/HMGCR/Sik1
CD44	other		1.709	0.0158	ACKR3/ACTA2/ADAM8/BIRC5/CCND2/CDKN1A/CRABP2/FASN/FKBP5/JUN/LIMS2/PTHLH/SDC4/THBS1/TRAF6/VCAM1/ZEB1
TGM2	enzyme		1.812	0.0163	ATP1B3/BNIP3/CA2/CSRNP1/HLA-B/MERTK/OAS1/ORC3/PIM1/PTGES/RARA/SAMHD1/SEMA7A/SLC25A15/SLC25A20/TAP1/TGFB1/THBS1/TIMM8A
HDL	complex		#VALUE!	0.0168	ATF3/LDLR/VCAM1
DPY30	enzyme		#VALUE!	0.0168	CCNE2/CDKN1A/ID1
PRKDC	kinase		#VALUE!	0.0168	CDKN1A/NR1D1/VCAM1
FCGR2B	transmembrane receptor		#VALUE!	0.0168	MX1/SOCS1/SOCS3
PPP3CB	phosphatase		#VALUE!	0.0168	CDKN1A/FBXO32/GADD45A
PYCARD	transcription regulator		#VALUE!	0.0168	ACTA2/CDKN1A/DUSP10
mir-203	microrna		#VALUE!	0.0168	BIRC5/LIFR/RNF2
MAP2K2	kinase		#VALUE!	0.0168	CDKN1A/ETV5/PCNA
NRAS	enzyme		#VALUE!	0.0168	CDKN1A/SESN3/SKP2
TOPBP1	other		#VALUE!	0.0168	CDKN1A/CDKN1B/GADD45A
IL17D	cytokine		#VALUE!	0.0168	MX1/OAS1/SOCS3
PPP1R13L	transcription regulator		-1.131	0.0168	CCND2/CDKN1A/H2AFX/SLC2A1
THBS4	other		0.762	0.0168	MANF/MMP16/TGFB2/VCAM1
F2R	g-protein coupled receptor		0.849	0.0168	CTGF/CXCL12/CYR61/VCAM1
USP18	peptidase		1	0.0168	MX1/OAS1/SOCS1/SOCS3
CHI3L1	enzyme		#VALUE!	0.0168	BHLHE40/NAMPT/SERPINE1/SLC39A14
NGFR	transmembrane receptor		#VALUE!	0.0168	CCNA2/CDKN1B/LDLR/PCNA
SLC13A1	transporter		1.265	0.0169	ARRDC2/ELOVL6/G0S2/GFM1/GPAM/HK2/NRN1/SRPRA/TUBA1C/ZNF292
TNFAIP3	enzyme	Activated	-2	0.0169	BIRC5/TGFB1/TNFAIP3/TRAF6/VCAM1
F7	peptidase		1.406	0.0169	CTGF/GADD45A/PAPOLA/RND3/ZFP36
SFN	other		#VALUE!	0.0169	FKBP5/IL1R1/KRT18/KRT8/ZEB1
IFNAR1	transmembrane receptor		0.028	0.0174	ATF3/HMGCR/OAS1/SERPINE1/SOCS1/SOCS3/THBS1/TLR3/TNFAIP3/VCAM1/VEGFB
N-cor	group		1.133	0.0174	ABCA1/ACACA/CDKN1A/DHRS3/ELOVL6/ESR1/FASN/HEBP1/HIVEP2/IDH1/SOCS1
RBPJ	transcription regulator		-0.789	0.0176	CDKN1A/CDKN1B/Cdkn1c/CXCL12/ECT2/FGF11/INHA/INHBB/JUN/KITLG/PIK3CG/TGFB2/WASF1
miR-34a-5p (and other miRNAs w/seed GGCAGUG)	mature microrna		0.743	0.0176	ATF3/BIRC5/CDK1/CDKN1A/DHFR/MCM10
NR1H3	ligand-dependent nuclear receptor	Activated	-2.93	0.0185	ABCA1/ACACA/ATF3/CDKN1B/FASN/FDPS/GPAM/HMGCR/LDLR/THRB
MYB	transcription regulator		-0.615	0.0185	ADM/BIRC5/CCNB1/CXCL12/CXCR4/JUN/KITLG/PCNA/PRAG1/SDC4
SAFB	other		-1.633	0.0192	HMOX1/HOXC6/JUN/MLLT3/NEDD9/PAPSS2/TCIM
TERT	enzyme		1.109	0.0192	ATF3/CCND2/CDKN1A/EREG/LEF1/MX1/RAB9A
COLQ	other		#VALUE!	0.0192	ASPN/BDNF/DTNA/FBLN5/LTBP3/MMP16/SDC4/SNTB2/TGFB1
DOCK8	other		0.707	0.0196	CCND2/CITED2/FGL2/MERTK/SAP30/SLCO3A1/SOCS1/TLR3
SPRY2	other		0.555	0.02	CDKN1A/ETV5/PCNA/PGK1/SLC2A1
KLF6	transcription regulator		-1.406	0.0203	ATF3/CDKN1A/CDKN1B/MKI67/PCNA/TGFB1
PAF1	other		1.633	0.0203	CITED2/PNP/SDC4/SERPINE1/ZC3HAV1/ZFP36
FBXW7	transcription regulator		1.722	0.0203	CDKN1B/Cdkn1c/GPAM/HSPH1/JUN/SERPINE1
NGF	growth factor		1.78	0.0203	CDKN1A/FSHR/GADD45A/GUCY1B3/JUN/NR4A1
NFIL3	transcription regulator		-1.982	0.0209	ACACA/CDKN1A/FASN/GADD45A
MTM1	phosphatase		-1.981	0.0209	BNIP3/EIF4EBP1/FBXO32/GTF2H1
MEF2	group		#VALUE!	0.0209	CPT1B/MEF2A/MYH11/NR4A1
NR0B1	ligand-dependent nuclear receptor		#VALUE!	0.0209	CYP19A1/FASN/FOXL2/HSPA4L
MBD1	other		#VALUE!	0.0209	EFNA5/ESR1/HOXA4/SLCO3A1
FGF1	growth factor		-0.788	0.0217	CDKN1A/CTGF/CYR61/HMOX1/NQO1/TGFB2/THBS1/TIMP3
SASH1	other		0.707	0.0217	CCND2/CITED2/FGL2/MERTK/SAP30/SLCO3A1/SOCS1/TLR3
HRAS	enzyme		1.044	0.0217	BIRC5/CDKN1A/HMOX1/PCNA/SESN3/SOCS3/TGFB1/TNFRSF10A
TCR	complex		1.673	0.0225	ADM/ALDOA/CDKN1B/CXCR4/DHX58/ELL2/JUN/JUNB/LMNB1/MX1/NR4A1/OAS1/PGAM1/PGK1/PIK3R1/PIK3R3/PIM1/SLC2A1/SLC2A3/SMAD7/SOCS1/SOCS3/TLR3/TNFAIP3/ZC3HAV1
IGF1R	transmembrane receptor		0.026	0.0225	ACTA2/ALDOA/ANKRD1/Cabp1/CDK1/CDKN1A/CDKN1B/CETN2/CYCS/DDIT3/ESR1/FASN/KIF20A/RBM3/SDC4/SLC25A20/TGFB1/TGFBI/TIMP3
BCO2	enzyme		#VALUE!	0.0229	ARRDC3/NR1D1/PRKAA2
hemoglobin	complex		#VALUE!	0.0229	HMOX1/NQO1/TFRC
EIF4G2	translation regulator		#VALUE!	0.0229	CCND2/CDKN1A/JUN
LRAT	enzyme		#VALUE!	0.0229	CCNA2/CCNB1/CDKN1A
mir-26	microrna		#VALUE!	0.0229	CCND2/CHORDC1/MAP3K2
ZBTB7A	transcription regulator		#VALUE!	0.0229	CDKN1A/PFKP/SLC2A3
MAFK	transcription regulator		#VALUE!	0.0229	EGLN3/HMOX1/NQO1
SMPD1	enzyme		#VALUE!	0.0229	ACTA2/TGFB1/UGCG
TEAD	group		#VALUE!	0.0229	CTGF/CYR61
CYP	group		#VALUE!	0.0229	HMOX1/NQO1
RNF187	enzyme		#VALUE!	0.0229	CDK1/JUN
PADI4	enzyme		#VALUE!	0.0229	CDKN1A/GADD45A
ORMDL3	other		#VALUE!	0.0229	ADAM8/TGFB1
NPSR1	g-protein coupled receptor		#VALUE!	0.0229	GADD45A/NR4A1
CINP	other		#VALUE!	0.0229	CDKN1A/CHEK1
CCDC3	other		#VALUE!	0.0229	ACACA/FASN
KMT2E	enzyme		#VALUE!	0.0229	CDC6/CDK1
TRIM29	transcription regulator		#VALUE!	0.0229	CDKN1A/ZEB1
DKK3	cytokine		#VALUE!	0.0229	MYH11/TAGLN
Fcor	enzyme		#VALUE!	0.0229	CCNG2/CDKN1B
MUCL1	other		#VALUE!	0.0229	CDKN1A/CDKN1B
PRDM16	transcription regulator		#VALUE!	0.0229	CDKN1A/SERPINE1
PHF6	transcription regulator		#VALUE!	0.0229	CSPG5/H2AFX
CDCA2	other		#VALUE!	0.0229	CDKN1A/CDKN1B
PSME3	peptidase		#VALUE!	0.0229	ACACA/FASN
CHRM1	g-protein coupled receptor		#VALUE!	0.0229	HNRNPA2B1/JUN
PUF60	other		#VALUE!	0.0229	CDKN1B/H2AFX
IL31RA	transmembrane receptor		#VALUE!	0.0229	SOCS1/SOCS3
HMGCR	enzyme		#VALUE!	0.0229	CTGF/CYR61
miR-192-5p (and other miRNAs w/seed UGACCUA)	mature microrna		#VALUE!	0.0229	BIRC5/ZEB1
HPGDS	enzyme		#VALUE!	0.0229	PTGDS/TGFB1
CALCR	g-protein coupled receptor		#VALUE!	0.0229	CDKN1A/CDKN1B
F10	peptidase		#VALUE!	0.0229	CTGF/VCAM1
RNF111	enzyme		#VALUE!	0.0229	SERPINE1/SMAD7
WFS1	enzyme		#VALUE!	0.0229	DDIT3/ERO1A
PEBP4	other		#VALUE!	0.0229	CDKN1A/ESR1
BDKRB1	g-protein coupled receptor		#VALUE!	0.0229	CTGF/TGFB1
SLC2A1	transporter		#VALUE!	0.0229	ACACA/SERPINE1
ISG15	other		#VALUE!	0.0229	MX1/OAS1
PTCH2	transmembrane receptor		#VALUE!	0.0229	CXCL12/KITLG
TNFAIP6	other		#VALUE!	0.0229	ACTA2/TNFAIP6
ERBIN	other		#VALUE!	0.0229	CDKN1A/SERPINE1
PNPT1	enzyme		#VALUE!	0.0229	CDKN1A/CDKN1B
EPOR	transmembrane receptor		#VALUE!	0.0229	JUNB/PIM1
ATF5	transcription regulator		#VALUE!	0.0229	APAF1/TXNIP
CYBA	enzyme		#VALUE!	0.0229	CDKN1A/SERPINE1
CHCHD2	other		#VALUE!	0.0229	ID1/TGFB1
Muscarinic cholinergic receptor	group		#VALUE!	0.0229	CYR61/JUN
APP	other		-0.391	0.023	ABCA1/ALDOA/ATP1B1/BDNF/CALB1/CTGF/CXCR4/CYCS/ENO2/ESR1/F2RL1/Fus/GHR/H2AFV/HIST1H4I/INA/MCM10/MERTK/PFKFB3/PGAM1/PGK1/SERPINE1/SLC11A2/SLC7A11/SOCS1/TNFRSF10A/TOP2B/TUBA1C/VCAM1/WASF1
DDX58	enzyme		-0.808	0.0232	AHNAK/MAT2A/OAS1/SOCS1/SOCS3/TLR3
MYBL2	transcription regulator		0	0.0235	BIRC5/CCNB1/CCNG2/CDK1/ID1
BMP2	growth factor		0.129	0.024	ACTA2/CDKN1A/CDKN1B/GREM1/IBSP/ID1/SMAD7/TAGLN
IRAK4	kinase		#VALUE!	0.024	ATF3/CSRNP1/ERRFI1/JUN/NR4A1/SOCS1/TNFAIP3/ZFP36
RORA	ligand-dependent nuclear receptor		0.762	0.0241	ATP1B1/CCNB1/CYP19A1/ELOVL6/HMGCR/NR1D1/NSDHL/PPP1R3C/RORA/SEMA3F/SLC2A3/SLC30A10/TLR3/VLDLR
NKX3-1	transcription regulator		#VALUE!	0.0242	CA2/CA8/FGF23/PIK3R1/PIM1/SDC4/VNN1
Pka	complex		0.055	0.0254	BIRC5/CTGF/DDIT3/HMGCR/JUN/JUNB/LDLR/NR4A1/PTHLH
GDF2	growth factor		-1.28	0.0255	CXCL12/CXCR4/ID1/SMAD7
HSPA9	other		1.982	0.0255	CDKN1A/Cdkn1c/CRABP2/NEDD9
PLP1	other		#VALUE!	0.0255	ATF3/CDKN1B/DDIT3/PPP1R15A
MPZ	other		#VALUE!	0.0255	DDIT3/DNAJC3/HMGCR/PPP1R15A
NOS1	enzyme		#VALUE!	0.0255	BDNF/FBXO32/SLC2A1/SOCS1
EFNA4	kinase		0.816	0.0263	CRABP2/CTGF/ETV5/FABP5/KRT18/PTHLH
ATF2	transcription regulator	Inhibited	2.207	0.0263	ATF3/DDIT3/DUSP10/GADD45A/JUN/MAT2A
PPRC1	transcription regulator	Inhibited	2.449	0.0263	DDIT4/ERRFI1/HK2/NAMPT/RND3/ZFP36L1
MYD88	other		0.547	0.0265	CXCL12/CYR61/FBXO32/LZTFL1/MAFF/MKI67/MSH2/PTGES/SAMHD1/SERPINE1/SLC16A3/SLCO3A1/SOCS1/SOCS3/TGFB1/TNFAIP3/VCAM1
FOXL2	transcription regulator		1.269	0.027	ATF3/CPM/MAFF/PPP1R15A/PTHLH/SPRY1/TNFAIP3
FOXA2	transcription regulator		-1.982	0.0273	ACTA2/ACTG2/CNN1/CPT1A/FABP5/IL33/MYH11/MYL9/NR1H4/PTGDS/RARA/RORA/TAGLN/TGFB1
SYVN1	transporter		-1.069	0.0273	ADAM9/AMOTL2/ASF1B/ATP1B3/BHLHE40/CDA/CYP1B1/FASN/HNRNPM/SLC2A1/SLC2A3/SLC43A2/TFRC/ZC3HAV1
miR-141-3p (and other miRNAs w/seed AACACUG)	mature microrna		-0.447	0.0274	CDKN1B/CYP1B1/GADD45A/LEF1/ZEB1
IL6R	transmembrane receptor		-0.277	0.0274	CDKN1A/CDKN1B/SOCS3/TGFB1/VCAM1
IRS1	enzyme		-1.987	0.0274	ACACA/BUB1/CRABP2/DDIT3/FASN/FBXO32/HMGCR/LDLR/PIK3R1/RAB9A/TGFBI/TRIB3
THRA	ligand-dependent nuclear receptor		0	0.0277	ANGPTL4/CDKN1B/CIRBP/CPT1A/HMOX1/JUN/LDLR/PTTG1/SYT12
LEPR	transmembrane receptor		0.956	0.0278	ACACA/ACTA2/ADAM8/ANGPTL4/EIF4EBP1/FASN/GPAM/H2AFV/HMGCR/LDLR/PC/SERPINE1/SOCS3/TGFB1/TIMP3
EFNA3	kinase		0.816	0.0298	CRABP2/CTGF/ETV5/FABP5/KRT18/PTHLH
BMP10	growth factor		#VALUE!	0.03	Cdkn1c/ID1/SMAD7
CFB	peptidase		#VALUE!	0.03	C3AR1/DDIT3/TGFB2
ZNF281	transcription regulator		#VALUE!	0.03	FANCD2/GADD45A/XRCC2
SLC2A4	transporter		#VALUE!	0.03	BDNF/SLC2A1/SLC2A3
NUMB	other		#VALUE!	0.03	CCNB1/CDK1/CDKN1A
mir-373	microrna		#VALUE!	0.03	ANGPTL4/PTHLH/SERPINE1
HFE	transmembrane receptor		#VALUE!	0.03	DDIT3/TFR2/TFRC
CD69	transmembrane receptor		#VALUE!	0.03	SOCS3/TGFB1/TGFB2
NTRK1	kinase		#VALUE!	0.03	CDKN1A/H2AFX/NR4A1
ACKR3	g-protein coupled receptor		#VALUE!	0.03	ADM/CCNB1/CDKN1A
CASR	g-protein coupled receptor		#VALUE!	0.03	CDKN1B/GABBR2/PTHLH
BCR (complex)	complex		1.337	0.0301	CCND2/CCNG2/CDC25A/CDKN1B/CXCR4/JUNB/NAMPT/PIM1/SLC2A1
ACOX1	enzyme	Activated	-2.496	0.0303	ACER2/CDKN1A/CXCL12/DDIT3/FAH/FASN/GADD45A/KLF6/KRT8/RBM3/RGN/TNFRSF10A/TRIB3
Histone h3	group		#VALUE!	0.0306	ACKR3/AKAP12/BDNF/BIRC5/CA9/CCNA2/CCNB1/CCND2/CDC6/CDKN1A/CDKN1B/CYP19A1/DUSP10/ESR1/FASN/FKBP5/GHR/HPSE/ID1/JUN/MX1/PCNA/POLD4/PTGES/RARA/RGS4/SOCS3/TAGLN/TNFAIP3/TOP2A/UPP1/WASF1/ZEB1
AZGP1	transporter		-0.958	0.0308	CDKN1B/FBXO32/GYS1/HK2
TNFSF14	cytokine		1.128	0.0308	ADAM8/F2RL1/TGFB1/VCAM1
NAMPT	cytokine		1.982	0.0308	BDNF/NAMPT/TGFB1/TGFB2
WWTR1	transcription regulator	Inhibited	2	0.0308	CTGF/CYR61/SERPINE1/SMAD7
HSF1	transcription regulator		-1.708	0.0311	BUB1B/CCNA2/CCT5/CCT6A/CDC6/CDK1/FASN/HMOX1/HSPA4L/HSPH1/KNTC1/LDLR/MAT2A/PGK1/VCAM1
CD14	transmembrane receptor		1.091	0.0316	IL1R1/SOCS1/SOCS3/TGFB1/VCAM1
CDKN2A	transcription regulator	Inhibited	2.151	0.0322	BIRC5/BUB1B/CCNA2/CCNB1/CDK1/CDKN1A/H2AFX/HOXC4/JUN/LEF1/MKI67/PCNA/SERPINE1
NR1H2	ligand-dependent nuclear receptor	Activated	-2.566	0.0327	ABCA1/ACACA/ELOVL6/FASN/FDPS/HMGCR/LDLR/LRP8/THRB
GPD1	enzyme		#VALUE!	0.0327	CPNE8/ELOVL6/GADD45A/GPCPD1/LIFR/NQO1/PFKFB3/PSAT1/VLDLR
SLC25A13	transporter		#VALUE!	0.0327	CPNE8/ELOVL6/GADD45A/GPCPD1/LIFR/NQO1/PFKFB3/PSAT1/VLDLR
PKD1	ion channel		-0.671	0.0329	ACOX2/ATP1B1/CDKN1A/CPEB3/EIF4EBP1/GREM1/IDH1/JAKMIP2/KRT18/MID1/NEDD9/PCDH7/PPRC1/TBC1D4/TNFAIP8/TNS1
GNA12	enzyme		1.941	0.0333	ACTA2/BAIAP2/CNN1/GSTA3/MYH11/PIK3R1/TAGLN
VCAN	other		-0.588	0.0345	ADM/ANGPTL4/BDNF/CDKN1A/CXCL12/FABP5/FBLN5/GUCY1B3/INHBB/TGFB1/VCAM1
JAK2	kinase	Activated	-2	0.035	ACER2/ACTN1/CCND2/CDC25A/CDKN1B/RARA/SOCS3/VLDLR
ZNF217	transcription regulator		0	0.035	ADM/CCNE2/CITED1/CXXC4/HOXC6/KRT18/SH3RF2/SHC4
NCOR1	transcription regulator		#VALUE!	0.0362	CDKN1A/CDKN1B/FASN/HOXC6/RARA
FHL2	transcription regulator		#VALUE!	0.0362	ACTA2/CLDN5/CNN1/CXCL12/INHA
GNL3	other		-1.98	0.0365	CDKN1A/CDKN1B/EDNRA/KRT18
MAFB	transcription regulator		-0.849	0.0365	ACTN1/CNN2/NUAK1/TAGLN
let-7a-5p (and other miRNAs w/seed GAGGUAG)	mature microrna		-0.322	0.0365	ACTA2/BIRC5/CCND2/THBS1
TIMP1	cytokine		0	0.0365	A4GALT/CDKN1A/Cdkn1c/TIMP3
ALOX15	enzyme		1.165	0.0365	HMOX1/JUN/VCAM1/XDH
NFATC3	transcription regulator		1.934	0.0365	ACTA2/ATF3/DDIT4/JUN
CSF1R	kinase		1.982	0.0365	CDKN1A/CDKN1B/JUN/VCAM1
LHX2	transcription regulator		#VALUE!	0.0365	BDNF/GPR50/NQO1/ROBO2
SUPT16H	transcription regulator		#VALUE!	0.0365	KRT8/LOXL2/LYPLA1/POLR3G
Cyclin E	group		#VALUE!	0.0366	CDKN1A/CDKN1B
SLC16A3	transporter		#VALUE!	0.0366	HK2/PFKFB3
CDK12	kinase		#VALUE!	0.0366	FANCD2/FANCI
UCHL5	peptidase		#VALUE!	0.0366	APAF1/CDC6
TRPM7	kinase		#VALUE!	0.0366	ANXA1/VCAM1
HYAL1	enzyme		#VALUE!	0.0366	CCNB1/CDK1
STAG1	transcription regulator		#VALUE!	0.0366	PCDH17/PCDH7
Ppp2c	group		#VALUE!	0.0366	CDKN1A/ID1
ACACA	enzyme		#VALUE!	0.0366	ELOVL6/FASN
LATS1	kinase		#VALUE!	0.0366	CCNB1/CTGF
CBX1	transcription regulator		#VALUE!	0.0366	BIRC5/CDKN1A
Pzp	other		#VALUE!	0.0366	LDLR/VLDLR
HAS1	enzyme		#VALUE!	0.0366	CCNB1/CDK1
GNE	kinase		#VALUE!	0.0366	DDIT3/TRIB3
NCK2	kinase		#VALUE!	0.0366	DDIT3/PPP1R15A
PDE3A	enzyme		#VALUE!	0.0366	CDKN1A/PTHLH
ERCC1	enzyme		#VALUE!	0.0366	CDKN1A/GHR
AKR1B1	enzyme		#VALUE!	0.0366	CDKN1A/CPT1A
AIF1	other		#VALUE!	0.0366	ACTA2/TGFB1
BAP1	peptidase		#VALUE!	0.0366	CDC14A/CDKN1B
FSTL3	other		#VALUE!	0.0366	CDKN1A/CDKN1B
HTR4	g-protein coupled receptor		#VALUE!	0.0366	CXCL12/VCAM1
EFEMP2	other		#VALUE!	0.0366	CTGF/FBLN5
ELK3	transcription regulator		#VALUE!	0.0366	HMOX1/SERPINE1
TNRC6A	other		#VALUE!	0.0366	CDKN1A/Cdkn1c
FURIN	peptidase		#VALUE!	0.0366	PCNA/TGFB1
SF1	transcription regulator		#VALUE!	0.0366	ACTA2/CNN1
Sik1	kinase		#VALUE!	0.0366	ACACA/FASN
CAPN2	peptidase		#VALUE!	0.0366	CDKN1B/DDIT3
IFNB1	cytokine		-0.614	0.0367	CDKN1A/GAS1/HMGCR/MCM10/MX1/OAS1/PHLDB2/RND3/SLC39A14/SOCS1/SPRY1/THBS1/TLR3/TNFRSF10A
AURK	group		-0.128	0.0375	ACER2/CDKN1A/HSPA4L/NYNRIN/PRAG1/TNFRSF10A
ANLN	other		0	0.0375	ACER2/CDKN1A/HSPA4L/NYNRIN/PRAG1/TNFRSF10A
Ptprd	phosphatase		#VALUE!	0.0381	BIRC5/CDK1/CDKN1A
ZC3H14	other		#VALUE!	0.0381	CITED2/FGL2/MERTK
XDH	enzyme		#VALUE!	0.0381	ACTA2/CTGF/SERPINE1
mir-33	microrna		#VALUE!	0.0381	ABCA1/ACACA/CPT1A
STK3	kinase		#VALUE!	0.0381	BIRC5/CTGF/WWTR1
NT5E	phosphatase		#VALUE!	0.0381	MKI67/SERPINE1/TGFB1
MAP3K1	kinase		#VALUE!	0.0381	SERPINE1/TGFB1/THBS1
S1PR2	g-protein coupled receptor		#VALUE!	0.0381	ACTA2/TGFB1/VCAM1
ITGB6	other		#VALUE!	0.0381	PTHLH/SERPINE1/TGFB1
GFI1B	transcription regulator		#VALUE!	0.0381	CDKN1A/SOCS1/TGFBR3
COL6A1	other		#VALUE!	0.0381	ALDOA/FASN/IDH1
MEF2A	transcription regulator		#VALUE!	0.0381	JUN/MEF2A/NR4A1
SENP1	peptidase		#VALUE!	0.0381	CRMP1/CYCS/IDH3A
ADRB1	g-protein coupled receptor		#VALUE!	0.0381	DDIT3/SMC4/THBS1
PRKD1	kinase		#VALUE!	0.0381	BIRC5/NR4A1/VCAM1
PEX5L	ion channel		#VALUE!	0.0381	FDPS/HMGCR/LSS
BAG1	other		#VALUE!	0.0381	CDKN1A/FKBP5/JUN
LMNB1	other		#VALUE!	0.0404	CXCL12/FASN/HMGCR/LDLR/S100A13/TGFB2/TGFBI
LIF	cytokine		0.324	0.0408	AHNAK/CYP19A1/EREG/GPCPD1/HK2/IBSP/KLF10/RGS4/SOCS1/SOCS3
NFKB1	transcription regulator		-0.16	0.0411	ANKRD1/BHLHE40/CCND2/CTGF/CYR61/DROSHA/FANCD2/GFRA1/HMOX1/MAT2A/NR4A1/PTX3/TGFB1/VCAM1
RAC1	enzyme		1.076	0.0412	ACTA2/ATF3/IL33/JUN/TGFB1
BMI1	transcription regulator		#VALUE!	0.0412	BNIP3/CDC14A/CDKN1B/DLC1/HK2
NR0B2	ligand-dependent nuclear receptor		#VALUE!	0.0412	ABCA1/ACACA/CPT1A/FASN/NR1H4
NR1D1	ligand-dependent nuclear receptor		#VALUE!	0.0412	ACACA/BNIP3/FASN/NAMPT/SLC2A1
TAF4	transcription regulator		-1.214	0.0415	BDNF/CTGF/GAS1/GREM1/MAFF/OAS1/PBK/TGFB1/THBS1
RUNX2	transcription regulator		-1.861	0.0416	ACTA2/CDKN1A/CYP19A1/IBSP/MYH11/PTGDS/SERPINE1/TAGLN
CXCL12	cytokine		0.528	0.0416	ACTA2/CXCL12/CXCR4/ID1/JUN/JUNB/LOXL2/RBM14
Raf	group		#VALUE!	0.0418	ETV5/MAFF/RND3/SEMA6A/SPRY1/TNFAIP3
PRKCI	kinase		-0.655	0.0429	ECT2/FASN/HK2/HMOX1
CXCR4	g-protein coupled receptor		0.218	0.0429	CXCL12/CXCR4/ID1/JUNB
PTH1R	g-protein coupled receptor		1.246	0.0429	CALB1/CDK1/FGF23/PTHLH
MAPK7	kinase		1.307	0.0429	BDNF/CDKN1B/JUN/MEF2A
CDK9	kinase		#VALUE!	0.0429	CCNB1/CXCR4/RAD1/TNFAIP3
TBP	transcription regulator		#VALUE!	0.0429	CDKN1A/EDNRA/MANF/TNFAIP3
TAF6	transcription regulator		#VALUE!	0.0429	ATF3/CDKN1A/GADD45A/JUN
PAX6	transcription regulator		1.455	0.0431	ADAM9/CCND2/CDC6/CDH6/CHKA/FAT4/HELB/MCM6/MCUR1/OAS1/SEMA5A/SMC2/SNRNP25/SOCS1/TFCP2
UCP1	transporter		1.132	0.0434	AMD1/ANKRD1/CEBPG/CTH/DDIT3/EIF4EBP1/EML1/FBXO32/GADD45A/PSAT1/SRM/TRIB3/XPR1
KLF4	transcription regulator	Inhibited	2.08	0.0454	ACTA2/BUB1B/CCNB1/CCND2/CDKN1A/CDKN1B/CENPE/CITED1/CRABP2/IRX3/Pdlim3/PFKP/SOCS1/TAGLN/TGFB2
MDM2	transcription regulator		-0.993	0.0464	ATF3/CDKN1A/CDKN1B/INHBB/THBS1/TOP2A
PTHLH	other		#VALUE!	0.0466	CDK1/CDKN1A/CDKN1B/Cdkn1c/SERPINE1
HOTAIR	other		#VALUE!	0.0472	MX1/OAS1/ZEB1
HCAR2	g-protein coupled receptor		#VALUE!	0.0472	CCNE2/KIF20A/PLK4
BCO1	enzyme		#VALUE!	0.0472	ARRDC3/NR1D1/PRKAA2
ALDH1A1	enzyme		#VALUE!	0.0472	ACACA/CPT1B/FASN
NREP	other		#VALUE!	0.0472	ACTA2/TAGLN/TGFB1
SPTLC2	enzyme		#VALUE!	0.0472	CTGF/DDIT3/THBS1
ROCK1	kinase		#VALUE!	0.0472	CCND2/CNN1/VCAM1
RETN	other		#VALUE!	0.0472	LDLR/SOCS3/VCAM1
SKIL	transcription regulator		#VALUE!	0.0472	ACTA2/SERPINE1/SMAD7
PEBP1	other		#VALUE!	0.0472	ACACA/ELOVL6/FASN
DDX5	enzyme		#VALUE!	0.0472	CDKN1A/JUN/TGFB1
FABP1	transporter		#VALUE!	0.0472	HMOX1/NR1H4/SLC27A1
SPDEF	transcription regulator		-1.134	0.0485	CDKN1A/CTGF/LEF1/SERPINE1/TGFB1/VEGFB/ZEB1
COL18A1	other		-0.647	0.0489	DDIT4/F2RL1/ID1/JUN/JUNB/PDCD5/SERPINE1/THBS1
CSF1	cytokine		0.053	0.0489	BIRC5/CCNB1/CDKN1A/JUN/PCNA/TLR6/TNFAIP3/TRAF6
DCN	other		0.218	0.0498	CDKN1A/CDKN1B/TGFB1/VCAM1
miR-17-5p (and other miRNAs w/seed AAAGUGC)	mature microrna		1.131	0.0498	BIRC5/CCND2/H2AFX/TXNIP
ALDH2	enzyme	Inhibited	2	0.0498	CTH/GSTA3/PSAT1/SLC7A11
SSRP1	other		#VALUE!	0.0498	KRT8/LOXL2/LYPLA1/POLR3G
SRSF2	transcription regulator		#VALUE!	0.0498	DDIT3/NR1H4/PPP1R15A/TNFRSF10A
XBP1	transcription regulator	Activated	-2.387	0.0504	BET1/COPG1/DDIT3/DNAJB11/DNAJC10/DNAJC3/ESR1/FKBP14/HMOX1/LMAN1/RAB3A/SEC11C/SPCS3/SRPRA/TNFRSF10A/VCAM1/WFS1
JAK1	kinase	Activated	-2.236	0.0587	CDKN1A/CDKN1B/ID1/MX1/SOCS3
SUMO3	other		1.982	0.0655	CCND2/CTH/PNP/TAP1
ECSIT	transcription regulator	Inhibited	2	0.0655	HMOX1/JUNB/PIM1/TNFAIP3
MYOCD	transcription regulator	Inhibited	2.108	0.0676	ACTA2/CDKN1A/CNN1/DDIT3/HSPB7/MYH11/TAGLN
TGFBR1	kinase	Inhibited	2.372	0.0678	ACTA2/BHLHE40/BIRC5/CTGF/FBLN5/GAS1
CTLA4	transmembrane receptor	Inhibited	2.236	0.0797	CCNA2/CDKN1B/KPNA2/MKI67/TOP2A
DIO3	enzyme	Inhibited	2	0.0833	CIRBP/FXYD6/MAMDC2/SEMA7A
JUNB	transcription regulator		1.941	0.0907	ATF3/BDNF/CDKN1B/FASN/HMOX1/IBSP/SERPINE1
FASN	enzyme		-1.946	0.093	ACACA/DDIT4/ELOVL6/FASN
REL	transcription regulator	Activated	-2.358	0.101	CCND2/CDC6/CDKN1A/CREM/DHFR/ESR1/ETV5/ICK/MLLT3/NR4A1/PPP1R15A/PTGDS/RDH10/SLC7A6/TNFAIP3/UBXN2B
HOXC6	transcription regulator	Inhibited	2	0.114	ERRFI1/SIPA1L1/TNFAIP8/VCAM1
NKX2-1	transcription regulator	Activated	-2.224	0.119	CA8/FSHR/KITLG/LEF1/MYH11/PC/RRM2/SERPINE1/SLC6A14/SMAD7/TGFB1/TGFB2/THBS1
Tgf beta	group	Inhibited	2.19	0.132	CYR61/MERTK/SERPINE1/TGFB1/TGFBI
PSEN1	peptidase	Inhibited	2.588	0.134	ALDOA/ATP1B1/BDNF/C3AR1/CYCS/DBP/ENO2/FBXW7/Fus/H2AFV/HIST1H4I/HSD17B1/LRP8/MCM10/MERTK/PGAM1/PGK1/PIK3R1/PRC1/SLC11A2/SOCS1/TGFB1/TIPARP/TOP2B/TUBA1C
NME1	kinase	Activated	-2	0.137	CDKN1A/HNRNPA2B1/SERPINE1/SMAD7
MKL1	transcription regulator	Inhibited	2.234	0.139	ACTA2/CNN1/CNN2/CXCR4/G0S2/MMP16/MYH11/MYL9/TAGLN
SOX2	transcription regulator	Activated	-2.223	0.144	ATF3/BHLHE40/CDKN1B/CITED1/CITED2/CRABP2/CTGF/CXCR4/ETV5/HOXC4/IRX3/KDM3A/KITLG/KLF6/KRT18/Pdlim3/PIK3R1/TGFB2/TIMP3
miR-145-5p (and other miRNAs w/seed UCCAGUU)	mature microrna		-1.987	0.149	ACTA2/AHNAK/MYH11/TAGLN
HSPA5	enzyme		-1.968	0.161	CPT1A/DDIT3/ESR1/FASN
PTPN1	phosphatase		-1.91	0.187	FASN/PIK3R1/SMAD7/SOCS1
TAL1	transcription regulator	Activated	-2.625	0.198	AATF/ASPM/BUB1/C3AR1/CCNB1/CCNG2/CDKN1A/CENPU/FBXW7/HLA-B/JUN/KIF20A/MYO1E/SLC2A3/TNFAIP3
PDCD1	phosphatase	Inhibited	2	0.201	CCNA2/KPNA2/MKI67/TOP2A
FAS	transmembrane receptor	Activated	-2.038	0.219	CDKN1A/CTGF/PPP1R15A/SERPINE1/TGFB1/TNFAIP3/ZFP36
PSEN2	peptidase	Inhibited	2.393	0.253	C3AR1/DBP/FBXW7/HSD17B1/PRC1/PSEN2
NLRP3	other	Inhibited	2.2	0.346	ACTA2/CDCA8/H2AFX/HMOX1/PTTG1
ISL1	transcription regulator	Activated	-2	0.534	ETV5/IRX3/Irx5/NXPH4
PRL	cytokine	Activated	-2.484	1	CCNB1/CDKN1A/DHX58/ESR1/ID1/OAS1/PC/SAMHD1/SOCS1/SOCS3
POU4F1	transcription regulator	Activated	-2	1	ETV5/IRX3/Irx5/NXPH4
