# Supplementary material for: Low Oxygen Levels Induce Early Luteinization Associated Changes in Bovine Granulosa Cells
Source: Front Physiol. 2018 Aug 7;9:1066. doi: 10.3389/fphys.2018.01066 (PMC6090175; doi:10.3389/fphys.2018.01066)
Supplement: DATA SHEET S9 — List of similarly regulated genes between “post LH surge follicular granulosa cells (in vivo)” and “low oxygen level treated granulosa cells (in vitro)”. [file Data_Sheet_9.xlsx]

## Sheet: Sheet1
Gene Symbol	Fold Change in present study (NOL/LOL)	Fold Change after LH surge In vivo (Christensonn et al, 2013)
ABCD1	-1.97	-2.86987
ABCD3	-1.16	-2.11893
ABLIM1	-1.09	-3.65964
ACER3	-2.19	-2.10111
ACO1	-1.34	-1.60976
ACOT13	-1.18	-3.15503
ACSS1	-1.18	-1.94709
ADPGK	-1.32	-2.03322
AES	-1.12	-3.67676
AFF1	-1.11	-4.43233
AHCY	-1.08	-2.04024
ALG2	-1.32	-1.90402
ALG5	-2.03	-3.37392
ALG6	-1.84	-3.07809
ALG8	-2.03	-2.32418
ALS2	-1.42	-1.52861
ANAPC5	-1.15	-5.68405
ANKLE2	-1.25	-1.59507
AP3S2	-1.45	-1.69765
APC	-1.39	-1.92858
APITD1	-2.08	-4.30416
APMAP	-1.16	-2.26684
ARL6	-1.27	-2.82984
ARL6IP4	-1.11	-1.57428
ARL6IP5	-1.22	-1.67093
ARMCX6	-1.05	-2.09353
ARV1	-2.88	-1.58148
ASB15	-3.53	-2.38232
ASF1B	-3.66	-4.29579
ASPM	-2.13	-12.3252
ATF5	-1.2	-1.70717
ATOX1	-1.96	-1.72433
ATP11B	-1.76	-1.73988
ATP2B4	-1.02	-5.56164
ATP5G1	-1.66	-2.22124
ATR	-1.93	-1.7118
AURKA	-1.32	-3.41351
AURKB	-1.54	-3.73184
AZIN1	-1.39	-2.17935
B3GNT3	-1.18	-4.30435
B4GALT1	-1.41	-3.22961
B4GALT3	-1.26	-2.54801
B4GALT6	-1.99	-2.68601
B9D1	-1.93	-2.34421
BCAS3	-1.03	-6.25897
BIRC5	-2.1	-18.6086
BMPR1A	-1.08	-1.59345
BORA	-2.22	-3.72058
BRCA1	-1.59	-6.01932
BRCC3	-1.19	-1.90344
BRI3BP	-2.97	-2.33062
BTD	-1.04	-2.35384
BUB1	-2.08	-14.0832
BUB1B	-2.62	-11.459
C15H11orf74	-1.01	-1.86984
C8H4orf27	-1.01	-1.99775
CA8	-2.98	-14.3906
CALM3	-2.28	-2.28169
CAPRIN2	-2.02	-2.79123
CASP8AP2	-1.84	-2.06273
CBX6	-1.77	-2.12075
CCDC134	-1.74	-9.69526
CCDC3	-1.15	-4.51564
CCL25	-1.18	-2.12391
CCNB1	-2.3	-11.6852
CCNB2	-1.9	-15.1012
CCND2	-2.43	-82.2116
CCNE2	-3.09	-9.92385
CCNF	-1.74	-6.16316
CCPG1	-1.3	-1.6818
CD320	-2.36	-1.67194
CD46	-1.13	-1.61191
CDAN1	-1.07	-2.08493
CDC20	-2.74	-10.3876
CDC25B	-1.25	-2.84218
CDC25C	-1.34	-3.18761
CDC42SE1	-1.74	-1.74257
CDC6	-2.46	-6.31087
CDCA3	-1.89	-11.0047
CDCA8	-2.02	-5.87532
CDK1	-2.72	-8.98603
CDK13	-1.1	-2.41502
CDK2	-1.52	-3.14008
CDKN2AIPNL	-1.32	-1.96033
CDKN2C	-1.29	-4.1857
CDR2	-1.82	-3.1984
CENPF	-1.6	-8.91106
CENPI	-1.51	-2.55972
CENPM	-1.3	-4.5823
CENPN	-2.84	-10.2083
CENPO	-1.92	-2.18866
CEP78	-2.05	-3.89693
CEPT1	-1.03	-2.00868
CETN4	-1.35	-3.53711
CGN	-1.31	-5.38086
CHAC1	-1.2	-4.28567
CHAF1A	-1.23	-3.40559
CHEK1	-2.29	-5.49064
CHN2	-1.5	-26.8266
CHPF	-1.05	-2.13671
CHRAC1	-1.08	-2.34204
CHST11	-1.19	-4.52447
CHTF18	-1.07	-2.58628
CISD1	-1.35	-5.19003
CKAP2	-2.69	-12.9007
CKAP2L	-1.59	-6.88938
CKAP5	-1.21	-1.91889
CKS1B	-1.3	-2.5146
CKS2	-1.19	-6.24206
CLCC1	-1.5	-2.28829
CNPY2	-1.29	-1.54587
COL21A1	-1.53	-2.97839
COPZ1	-1.31	-1.67968
CRELD1	-1.09	-1.58901
CRELD2	-1.93	-1.87077
CSPG4	-1.12	-6.7861
CTAGE5	-2.43	-1.55863
CUL7	-1.16	-1.95619
CYB5R1	-1.06	-1.76333
CYBB	-1.26	-8.90614
CYP19A1	-7.56	-11.7165
CYP4V2	-1.31	-2.33096
CYTH1	-1.03	-4.37086
DAG1	-1.06	-1.58408
DBF4	-1.16	-4.001
DCAF10	-1.16	-1.558
DDHD2	-1.69	-1.77094
DDOST	-1.33	-2.09445
DDX31	-1.01	-2.0503
DEK	-1.33	-2.18099
DENND2A	-1.84	-10.4966
DHFR	-2.5	-6.50207
DHRS11	-1.43	-1.67976
DISP1	-1.31	-1.90193
DNMT1	-1.55	-2.24307
DOCK5	-1.82	-4.63868
DOLPP1	-1.63	-1.72142
DPYD	-1.52	-3.22442
DSN1	-1.27	-4.85415
DTYMK	-1.01	-3.99995
DUS4L	-1.95	-2.2597
DUT	-1.06	-11.3629
E2F6	-1.53	-1.60257
E2F8	-1.61	-5.30302
ECT2	-2.15	-7.13268
EDEM3	-1.68	-2.47302
EEPD1	-2	-1.8932
EFCAB2	-1.68	-3.42223
EFHD1	-1.75	-9.24605
EID3	-1.38	-1.84904
EIF2AK3	-1.4	-1.83505
EIF2B4	-1.24	-1.73726
EIF4E2	-1.55	-2.11041
ELF2	-1.28	-1.68125
ELOVL6	-4.42	-7.28327
EMID1	-1.24	-3.2221
ENDOG	-1.08	-3.42462
ENO3	-1.2	-2.88881
ENPEP	-1.09	-12.0941
EPB41L2	-1.02	-2.10549
ERAS	-1.09	-2.89052
ERCC6L	-1.52	-8.10439
ERLIN1	-1.93	-2.0374
ERLIN2	-1.26	-1.79612
ERP44	-1.05	-2.74383
ESPL1	-1.93	-8.68075
ESR2	-2	-3.48229
EXOSC10	-1.09	-3.0748
EZH2	-1.48	-2.66274
FAM122B	-1.27	-2.57908
FAM177A1	-1.6	-2.84188
FAM3C	-1.77	-1.70665
FAM83D	-1.32	-6.85749
FANCI	-2.44	-7.71859
FBL	-1.52	-2.10678
FBXO15	-1.28	-2.5155
FBXO5	-2.03	-13.41
FBXW7	-3.56	-2.35579
FEN1	-1.43	-2.57707
FICD	-1.2	-2.53431
FITM2	-2.63	-5.88188
FKBP14	-3.64	-8.3322
FKBP2	-1.36	-2.50153
FLVCR2	-2.35	-9.92188
FN3KRP	-1.14	-1.95473
FNDC3B	-1.39	-4.23805
FOXM1	-1.07	-2.66696
FSHR	-3.17	-4.05863
FUNDC1	-1.1	-2.83717
FUT1	-1.21	-4.29654
FZD1	-1.07	-13.867
G3BP1	-1.78	-1.75978
GAS8	-1.03	-1.85988
GATC	-1.15	-2.62184
GBAS	-1.18	-1.54617
GEMIN6	-2.1	-2.34382
GGCT	-1.1	-2.46952
GINS3	-1.48	-2.396
GJA1	-1.29	-2.65749
GLRX5	-1.45	-2.75668
GMNN	-1.35	-5.58124
GMPPA	-1.32	-1.68706
GNG10	-2.05	-4.08231
GPSM2	-1.07	-7.192
GRK5	-1.42	-8.92692
GSTP1	-1.3	-1.58711
GUCY1A3	-1.55	-3.0772
GUF1	-1.15	-2.95269
GYLTL1B	-1.06	-4.22128
H2AFV	-2.38	-2.00671
H2AFX	-2.51	-2.91785
H2AFZ	-1.72	-1.98954
H2B	-1.17	-2.44316
H2B	-1.63	-2.44316
H2B	-1.71	-2.44316
H4	-1.34	-2.80458
HAUS4	-1.01	-2.43585
HEG1	-4.41	-29.685
HINT2	-1.16	-1.85136
HINT3	-1.49	-2.0047
HJURP	-1.88	-19.2148
HMGN2	-1.31	-4.03117
HMGXB3	-1.31	-2.34625
HMMR	-1.99	-8.19568
HN1L	-1.21	-2.447
HNRNPH3	-1.49	-1.57371
HOMEZ	-1.05	-1.80942
HSPG2	-1.09	-1.86592
HYDIN	-1.04	-2.92661
IAH1	-1.22	-2.76567
ICT1	-1.06	-1.59468
ID3	-1.64	-5.17069
IDH3A	-2.3	-7.0015
IGF1R	-1.37	-1.94348
IGFBP4	-1.35	-6.62255
IL6R	-1.05	-18.0912
IMPACT	-1.47	-1.89453
IMPDH2	-1.29	-4.9598
INHBB	-2.75	-1.57826
INVS	-1.22	-1.70227
IQGAP3	-1.73	-2.32381
ISOC1	-1.36	-1.64757
ITGB1BP1	-1.28	-1.8265
KDELR2	-1.31	-1.6306
KDELR3	-1.67	-2.7587
KIAA0586	-1.32	-2.04878
KIF20A	-3.53	-9.44899
KIF22	-1.34	-2.75079
KIF23	-2.56	-7.14254
KIF24	-1.52	-2.13372
KIF2C	-2.69	-6.26746
KIF4A	-2.03	-4.50972
KIFC1	-1.19	-5.20931
KLHL13	-1.01	-3.19091
KNTC1	-3.17	-5.9167
KPNA2	-3.09	-3.82202
KRAS	-1.45	-2.1813
KRTCAP2	-1.17	-1.9952
LACTB	-1.48	-1.58262
LAGE3	-1.2	-1.94342
LAMC2	-1.68	-23.13
LAPTM4B	-1.22	-3.31919
LHPP	-1.14	-1.93838
LMAN2L	-1.3	-1.95044
LMNB1	-4.35	-3.54833
LNP1	-2.19	-6.19439
LOC514234	-1.33	-1.65222
LOC613276	-1.13	-4.24391
LOC613276	-1.25	-4.24391
LOC781415	-1.24	-2.01789
LRP8	-8.18	-9.33468
LRRC8D	-1.04	-4.7259
LRSAM1	-1.08	-2.51493
LSM3	-1.56	-1.90907
LSM4	-1.87	-2.32799
MACROD1	-1.18	-3.954
MAGEF1	-1.53	-3.20179
MAGOHB	-1.56	-3.3444
MAL2	-1.33	-3.70067
MANSC1	-1.02	-2.44105
MBLAC2	-1.48	-2.06942
MBTPS1	-1.17	-1.82391
MCAM	-1.98	-6.82354
MCM2	-1.76	-2.92582
MCM3	-1.67	-6.34988
MCM5	-1.96	-2.26229
MCM6	-2.2	-1.9916
MCOLN1	-1.02	-1.92478
MDFIC	-1.03	-4.68464
MDH2	-1.35	-2.96966
MELK	-1.81	-6.55382
METTL5	-1.02	-2.24553
MEX3C	-1.46	-3.04104
MFAP3	-1.82	-1.60283
MGAT4B	-1.22	-1.62244
MIS12	-1.23	-2.47788
MKRN1	-1.01	-2.13708
MMAB	-1.24	-2.43447
MORN4	-1.29	-2.31274
MOSPD3	-1.53	-5.45146
MPV17	-1.13	-1.60705
MPV17L2	-2.73	-3.47008
MRC2	-1.03	-2.95473
MRPL11	-1.07	-1.58687
MRPL24	-1.03	-2.93066
MRPL34	-1.72	-2.9877
MRPL41	-1.54	-2.04673
MRPS17	-1.14	-2.13878
MRPS23	-1.32	-2.25298
MRPS26	-1.23	-1.72715
MTCP1	-1.96	-2.8357
MTR	-1.21	-13.8634
MTX1	-1.58	-2.5663
MXD3	-1.06	-4.77093
MYBL2	-1.74	-1.96158
NAGLU	-1.34	-2.48472
NASP	-1.6	-3.17207
NAT1	-1.26	-2.0945
NBEAL1	-1.53	-2.41491
NCAPD2	-1.58	-4.69201
NCAPG	-1.2	-16.0417
NCAPG2	-1.78	-6.20025
NCAPH	-2.42	-7.51849
NDC80	-3.53	-10.2455
NDUFA13	-1.17	-1.90396
NDUFA3	-1.23	-2.30558
NDUFA6	-1.49	-1.79212
NDUFA7	-1.18	-1.59497
NDUFB4	-1.53	-2.06617
NEO1	-1.72	-2.11209
NEU1	-1.36	-2.0162
NEU3	-1.4	-2.43321
NFE2L1	-1.21	-2.47691
NMB	-1.24	-7.7593
NOL7	-1.43	-1.70337
NOTCH2	-1.18	-2.59097
NPR3	-1.97	-4.31812
NSL1	-1.13	-3.57902
NT5DC1	-2.19	-2.73269
NUP188	-2.69	-1.62504
NUP37	-1.38	-1.82738
NUP88	-1.04	-1.66785
NUSAP1	-2.22	-12.695
OAT	-1.46	-3.88272
OBSL1	-1.52	-14.7165
OIP5	-1.39	-5.24868
OPTN	-1.13	-12.8318
OSTC	-1.76	-2.30268
OXNAD1	-1.18	-1.53561
P4HA2	-1.06	-1.71907
PALB2	-1.13	-3.20647
PCNA	-2.35	-4.15788
PCYOX1L	-1.18	-2.40919
PDSS1	-2.22	-16.4982
PDZD11	-1.45	-2.10142
PECR	-1.22	-3.7212
PEMT	-1.27	-1.59857
PEX11A	-1.33	-1.72119
PEX11G	-1.43	-1.71556
PIGB	-1.4	-3.03391
PIGF	-1.15	-1.57808
PIGH	-1.04	-3.24234
PIGV	-1.26	-2.5058
PIGW	-1.09	-2.31836
PIK3AP1	-1.56	-4.72389
PKD2	-1.91	-1.76857
PKP4	-1.03	-3.56865
PLA2G12A	-1.46	-3.50347
PLEK2	-1.87	-3.69697
PLEKHH1	-1.47	-7.47578
PLK1	-1.86	-3.30374
PLK4	-2.18	-3.0128
POLA1	-1.2	-1.74489
POLA2	-1.66	-1.86236
POLD3	-1.46	-2.16541
POLE2	-2.04	-3.08692
POLH	-1.15	-3.0431
POLR3GL	-1.34	-1.67565
POP5	-1.74	-3.09622
PPA2	-1.54	-2.21555
PPAPDC1B	-1.26	-1.54177
PPAPDC2	-1.29	-2.89846
PPCS	-1.2	-1.72786
PPIP5K2	-1.25	-1.64333
PPRC1	-2.48	-1.64411
PPT1	-1.35	-2.52188
PPT2	-1.39	-1.5562
PRC1	-2.69	-8.90717
PRR15	-1.39	-31.4169
PRUNE2	-1.19	-4.27428
PSIP1	-1.12	-2.02132
PSMA5	-1.74	-1.66825
PSMB1	-1.06	-1.62372
PSMB2	-1.26	-1.96695
PSMB3	-1.37	-2.16735
PSMB6	-1.71	-1.64505
PSMB7	-1.2	-1.63275
PSMC3	-1.12	-1.69811
PSMC5	-1.86	-1.86288
PSME1	-1.06	-1.80538
PSPC1	-2.47	-1.7139
PTGES3	-1.02	-1.58905
PTGFRN	-1.02	-4.63889
PTPLB	-1.44	-1.8979
PTPMT1	-1.33	-2.02761
PTTG1	-2.73	-8.40074
PVRL3	-1.8	-2.86486
PWWP2A	-1.46	-2.16052
RAB15	-3.93	-2.70879
RAB26	-1.03	-3.99237
RAB38	-1.22	-7.55464
RACGAP1	-1.71	-7.27668
RAD17	-1.13	-1.5286
RAD18	-1.08	-3.40931
RAD51AP1	-1.21	-13.0878
RAD51AP1	-1.21	-13.0878
RAD54B	-1.04	-2.22357
RAD54L	-1.62	-2.33755
RADIL	-1.02	-1.66092
RALA	-1.13	-1.59642
RARS2	-1.67	-2.78561
RB1	-1.44	-1.91812
REEP4	-1.92	-3.18024
RELL1	-1.25	-5.80362
RELT	-1.09	-1.56785
RER1	-1.3	-1.70272
RFC2	-1.27	-3.18937
RFC3	-1.1	-2.22704
RFX5	-1.78	-3.67502
RMI2	-1.59	-4.23224
RMND1	-1.04	-2.34884
RNASEH2C	-1.82	-2.41264
RNASEK	-1.02	-1.89384
RNF121	-1.39	-1.81284
RNF149	-1.62	-2.33294
RNF7	-1.49	-1.63686
RNFT1	-2.96	-2.91528
ROBO2	-2.2	-10.1423
ROGDI	-1.22	-1.73218
ROR2	-1.19	-12.3388
RPA2	-1.37	-2.59115
RPA3	-1.21	-4.19121
RPAP3	-1.32	-4.05348
RPRD1B	-1.18	-2.01018
RRAD	-1.03	-6.04577
RRM2	-5.75	-3.96953
RWDD3	-3.66	-3.15488
SAE1	-2.09	-2.84363
SCARB2	-1.17	-4.3335
SCD	-1.42	-3.94375
SEC11A	-1.24	-1.73103
SEC23A	-1.67	-1.56711
SEC61B	-1.17	-1.97452
SEC62	-1.39	-1.61773
SEC63	-1.19	-1.88739
SENP6	-1.1	-1.6202
SERF1A	-2.02	-1.92566
SERPINH1	-1.47	-2.44313
SFT2D1	-1.82	-1.67423
SGCB	-1.53	-2.62765
Sgce	-1.11	-2.17436
SGOL1	-1.61	-8.76579
SGOL2	-1.77	-3.57452
SH3D19	-1.24	-5.49564
SHCBP1	-1.71	-17.6565
SIKE1	-2.15	-3.67012
SKA1	-2.01	-9.0962
SKA3	-2.2	-5.16074
SLBP	-1.07	-1.71762
SLC12A7	-1.54	-2.38645
SLC16A6	-1.23	-1.80609
SLC22A23	-1.08	-1.70201
SLC25A20	-2.61	-8.23067
SLC25A26	-1.11	-1.59472
SLC25A28	-1.08	-5.23102
SLC25A37	-1.17	-1.94962
SLC25A37	-1.54	-1.94962
SLC29A1	-1.47	-5.5246
SLC29A2	-1.76	-1.69114
SLC30A5	-2.2	-1.82626
SLC35A1	-2.32	-1.6142
SLC35A5	-1.3	-1.76318
SLC35E3	-1.57	-2.48539
SLC39A14	-2.23	-8.19234
SLC40A1	-1.08	-4.95466
SLC43A2	-2.22	-5.27273
SLC5A3	-1.2	-2.79589
SMC2	-2.15	-5.56645
SMC4	-2.36	-4.05792
SMOC2	-1.01	-5.71566
SNAP23	-1.15	-1.56977
SNRPG	-1.44	-1.74956
SNRPG	-1.46	-1.74956
SNX24	-1.23	-2.47493
SOAT1	-1.17	-2.34643
SOBP	-1.39	-1.96722
SORL1	-1.59	-3.17463
SPAG5	-2.15	-12.8669
SPC24	-1.96	-13.2819
SPCS2	-1.05	-2.06313
SPIN2	-2.54	-2.24868
SREBF2	-1.33	-1.58134
SRGN	-1.47	-29.9357
SRI	-1.91	-1.58066
ST3GAL2	-1.03	-2.35846
ST3GAL6	-1.56	-2.75347
ST7L	-1.27	-1.74459
ST7L	-1.27	-1.74459
STIL	-3.35	-8.36723
STIM1	-1.73	-4.41378
STOML2	-1.16	-1.83421
STRA13	-2.02	-2.71097
STRA6	-1.76	-5.32439
STRBP	-1.38	-2.45145
STT3A	-1.79	-2.23807
STT3B	-1.72	-2.09415
STX17	-1.11	-1.85547
SULT2A1	-1.07	-2.22337
SUMF2	-1.31	-1.76592
SUSD4	-1.03	-4.14343
SUZ12	-1.55	-1.65571
SYNGR2	-1.2	-3.82718
SYNPO	-1.24	-10.2054
TACC3	-1.29	-5.43849
TAF12	-1.14	-1.70924
TAF5	-1.49	-2.12849
TAPT1	-1.7	-1.66667
TBC1D13	-1.44	-1.81119
TBCCD1	-1.03	-1.72102
TCEB2	-1.7	-1.56696
TCFL5	-1.37	-4.30533
TECR	-1.47	-2.20303
TEX261	-1.44	-1.54269
TFCP2	-2.01	-2.05342
THYN1	-1.24	-1.82571
TK1	-2.64	-16.0991
TLE2	-1.02	-3.08896
TMED1	-1.15	-1.53775
TMED4	-1.47	-1.81282
TMEM120A	-1.92	-2.82501
TMEM129	-1.5	-2.23049
TMEM135	-1.57	-1.89918
TMEM159	-1.53	-3.18376
TMEM161A	-1.43	-1.71463
TMEM168	-1.74	-1.98349
TMEM170A	-1.72	-2.10556
TMEM184B	-1.74	-4.11195
TMEM19	-1.02	-1.7055
TMEM209	-1.33	-3.04655
TMEM216	-1.84	-1.90584
TMEM223	-1.74	-1.95134
TMEM38B	-1.32	-3.66876
TMX2	-1.72	-1.61326
TNFAIP8L3	-1.56	-5.51964
TNPO1	-1.35	-5.43917
TOMM22	-1.18	-1.87277
TOMM40L	-1.09	-2.46507
TOP2A	-2.02	-16.946
TOR3A	-1.94	-3.36444
TP53I13	-1.1	-2.24488
TPD52	-1.09	-2.1678
TPRKB	-1.52	-2.13063
TPX2	-1.96	-4.97778
TRIB2	-1.8	-44.8797
TRIP13	-1.69	-3.64215
TRNAU1AP	-1.54	-1.75274
TROAP	-1.5	-5.13176
TRPC2	-1.02	-1.77012
TSPYL4	-1.37	-2.32373
TSTA3	-1.09	-1.5974
TTBK2	-1.1	-2.66545
TTC13	-2.27	-1.93901
TTC36	-1.19	-2.04944
TUBD1	-1.33	-1.83155
TUBGCP3	-1.43	-1.97444
TXNDC11	-1.59	-2.68665
TXNRD1	-1.36	-1.84552
TYMS	-1.02	-3.68915
UBAC2	-1.03	-1.64139
UBE2C	-1.15	-14.4461
UBE2J1	-1.47	-2.78324
UBE2S	-1.96	-5.01741
UCK2	-1.23	-5.39813
UHRF1	-1.68	-10.1103
UNC119B	-1.13	-1.77825
UNC50	-2.16	-2.26618
UNG	-1.47	-3.37323
UQCR10	-1.16	-1.62586
UQCRQ	-1.32	-1.77307
USP1	-1.4	-4.7292
USP40	-2.62	-2.37112
VRK1	-1.74	-3.33459
WDR19	-1.8	-2.0556
WDR76	-1.59	-12.0751
XPO1	-1.14	-1.90126
XPOT	-1.45	-1.76527
YIPF2	-1.39	-1.78894
ZDHHC3	-1.29	-2.31731
ZMYM1	-1.81	-2.86965
ZNF462	-1.96	-2.16722
ZNF771	-1.01	-1.88479
ZW10	-2.16	-2.50362
ZWINT	-1.05	-3.26979
AATF	2.42	1.30366
ABL1	1.07	2.29987
ACADM	1.19	2.30793
ACBD3	1.36	1.89768
ACTC1	1.15	1.56458
ADAM19	1.46	7.08131
ADCK4	1.29	1.70594
ADH6	1.86	6.27334
ADHFE1	1.04	9.65889
ADM	4.82	8.86752
AGFG1	1.19	2.14374
AHNAK	2.13	4.46015
AHSG	1.59	152.31
ANXA1	2.07	8.28654
ANXA3	1.17	14.6931
APOM	1.03	1.66756
APP	1.29	11.5361
ARAF	1.24	14.4829
ARHGAP24	1.07	17.0199
ARHGAP29	2.72	2.15048
ARHGAP5	1.23	1.79699
ARHGEF7	1.04	1.56132
ARID4B	1.1	1.88909
ARID5B	3.19	2.71394
ASB6	1.53	1.9833
ATIC	1.16	2.6983
ATMIN	1.27	1.8157
AVPI1	1.15	3.04268
BAG5	1.09	1.37862
BASP1	1.34	15.9296
BCL3	1.11	2.09427
BCL6	1.72	7.29688
BNIP3L	1.28	1.96678
BOK	1.14	2.25195
C10H14ORF166	1.26	2.03191
C10H14orf37	1.44	18.2861
C11H9ORF78	1.01	1.25589
C16H1ORF21	1.95	3.36948
C27H8orf4	2.16	59.1357
C3H1ORF50	1.13	1.38904
CABYR	1.11	13.2962
CACNB3	1.48	8.63987
CADM1	1.03	10.3934
CAMK1D	2.37	3.42437
CAMK2N1	1.07	2.5707
CAND2	1.04	3.96964
CAPG	1.37	7.26064
CAPZA2	1.76	1.5517
CAST	1.27	3.12016
CAV1	1.07	507.874
CAV2	1.05	6.1139
CBLB	1.62	5.18996
CCDC92	1.19	2.53327
CCDC97	1.05	1.46525
CCNDBP1	1.02	1.47645
CD109	1.31	10.7566
CD14	1.08	1.91182
CD36	1.32	6.19893
CD59	1.09	2.05188
CDC37L1	1.57	1.92797
CDC40	1.1	3.66985
CDC5L	1.43	2.82623
CDH17	1.13	7.50799
CDKN1C	2.83	24.4365
CDKN2AIP	1.49	1.5512
CELF4	1.33	1.94819
CEP76	2.14	2.79705
CHMP1B	1.25	2.25351
CHMP4B	1.83	2.30176
CHST7	1.02	3.01551
CIDEC	1.13	1.89063
CLCN4	1.22	1.82809
CLEC14A	1.01	4.31295
CLIC4	1.19	2.2427
CLN5	1.02	1.57811
CNN2	2.35	2.43704
COL4A1	1.08	2.88493
COL4A6	1.12	4.15874
CORO7	1.03	3.00376
COTL1	1.29	7.51205
CPNE7	1.01	1.78913
CPT1B	3.08	6.7947
CSNK1A1	1.09	3.47896
CSRNP1	2.13	7.02386
CSRP2	1.15	2.74522
CSTB	1.34	20.0209
CSTB	1.12	20.0209
CTGF	4.71	8.43491
CTNNBL1	1.26	1.2155
DAPK3	1.75	1.853
DBNDD2	1.19	3.82016
DDAH2	1.78	3.5674
DDT	1.19	1.71498
DDX3X	1.14	2.49199
DDX47	1.25	1.53222
DDX58	1.09	4.47452
DIRAS3	1.28	1.80399
DKK3	1.22	152.311
DMPK	1.07	3.16242
DNER	1.33	12.4085
DSTN	1.1	2.17179
DUSP1	1.2	5.15739
DYRK3	1.55	1.58685
EFHD2	1.22	1.83436
EGR1	1.38	7.95806
EIF1AD	1.02	1.38047
EIF4E3	1.02	3.33617
ENO2	2.02	5.29807
ENPP2	1.13	5.1989
ENPP5	1.26	3.29635
EPB41L4A	1.05	2.50884
EPS8	1.06	1.20221
ETS2	1.23	2.52131
EZR	1.76	2.97035
FAM129A	1.29	4.04217
FAM46B	1.23	2.82922
FBLIM1	1.16	6.09152
FBLN1	1.15	5.95193
FBXO18	1.04	3.08848
FERMT2	1.98	2.18463
FGD4	1.25	2.2129
FGFR2	1.29	4.73215
FHL3	1.36	10.0741
FILIP1L	1.22	4.94089
FKBP1A	1.95	1.96904
FLII	1.19	1.40874
FLNA	1.01	2.97201
FLNB	2.88	7.73013
FN1	1.85	13.5493
FOSL2	1.26	29.656
FRMD6	1.51	6.66296
FSCN1	1.29	2.35937
FTL	1.08	2.14266
GAL	1.03	21.0599
GEM	1.34	20.0403
GGTA1	1.37	3.80848
GNAI1	1.12	3.56856
GNG2	1.22	59.2603
GPC1	1.2	1.88385
GPC4	1.47	3.73376
GPR153	1.51	2.10592
GPRC5B	1.36	8.40756
GSTM1	1.17	2.68043
GUSB	1.09	7.2865
HBP1	1.03	2.17861
HCFC1R1	1.37	2.23713
HDAC11	2.03	1.57565
HEXB	1.43	1.96672
HHAT	1.61	1.95312
HMCN1	1.53	3.74847
HMGA1	1.2	4.8274
HNMT	1.06	2.10216
HPS5	1.3	1.97532
HTR2B	1.04	1.91491
IGF2	1.53	17.4772
IGFBP3	1.52	4.89884
IK	1.19	1.30456
IMPA1	1.36	2.42501
IQCK	2.24	3.24988
ISCA1	1.47	2.59982
ISCU	1.08	1.60566
ITGB1	1.01	1.74505
ITPKC	1.03	2.10537
JAK1	1.19	2.10303
JOSD1	1.4	1.34508
JUN	2.88	2.76317
JUNB	3.91	4.14092
KALRN	1.1	7.69946
KAT2B	1.28	3.73884
KCNMA1	1.68	5.23262
KIAA1462	1.09	7.26992
KIT	1.75	32.1606
KLF15	1.19	3.77164
KLF5	1.01	3.27864
KLF6	2.01	3.39815
KLHL25	3.63	1.5418
LARS	1.23	1.90833
LCAT	1.22	2.20341
LMCD1	2.23	6.20971
LMO4	1.09	2.57322
LMO7	1.16	40.5859
LOC100126544	1.28	1.4799
LOC508098	1.08	33.925
LOC512486	1.07	8.52581
LOC537017	1.02	2.06954
LPAR1	1.1	4.86986
LRCH1	1.01	2.21397
LRRC1	2.74	2.47966
LRRC3	1.73	1.51735
LRRFIP1	2.43	4.86992
LXN	1.08	1.9011
MACF1	1.48	1.80488
MAFK	1.4	2.42183
MAP2K1	1.72	2.08883
MAP2K6	1.02	4.54932
MAPK14	1.34	2.38593
MAPK6	1.22	1.59982
MBNL1	1.02	1.77514
MDK	1.36	3.82009
MFSD6	1.23	2.23924
MGAT4A	1.46	6.16162
MICAL1	1.49	2.69958
MKL1	1.18	2.41068
MMP11	1.2	5.04775
MMP23B	1.23	14.3865
MOSPD2	1.44	6.3393
MRPS35	1.62	1.47059
MSX1	1.74	15.2269
MTMR11	1.6	2.14001
MTRF1	1.01	1.69143
MVP	1.07	3.34986
MYL12A	1.29	1.78237
N4BP1	1.44	2.2202
NARF	1.22	2.01887
NBEAL2	1.07	2.50906
NBR1	1.03	1.97391
NCK1	1.07	2.90319
NCOA4	1.18	1.54189
NDRG1	11.96	63.7521
NEDD4	1.2	3.8251
NEDD4L	1.14	3.46002
NELL2	1.3	7.82898
NFIL3	3.18	4.04268
NFKBIA	1.05	4.74511
NID2	1.11	154.591
NKD2	1.36	1.88997
NOTCH4	1.05	1.11384
NPEPPS	2.19	1.30881
NSG1	1.25	15.964
NUAK1	2.08	11.3219
NUP210	1.14	2.57263
NXN	2.02	4.10112
OCIAD2	1.38	4.21105
OSBPL1A	1.14	1.5831
OSBPL9	1.18	2.1493
OSMR	1.75	3.94102
P4HA3	1.83	75.7678
PALLD	1.19	4.01381
PARP16	1.07	1.40052
PCBP4	1.52	2.36537
PDCD4	1.23	2.61989
PDLIM7	1.45	1.80769
PDXP	1.01	2.02714
PELI1	1.09	3.97271
PFKFB3	3.22	1.78381
PGA5	1.08	4.87234
PGPEP1	1.29	3.07767
PID1	1.44	13.9096
PIGT	1.02	1.74879
PIH1D1	1.16	1.55016
PIR	1.12	7.28785
PJA2	1.01	1.47338
PLBD2	1.06	1.55369
PLEKHB1	1.04	5.0953
PLEKHO1	1.31	3.59177
PLSCR4	1.5	4.78851
PNMA2	1.11	41.3108
PNMT	1.28	2.47858
PPAP2C	2.18	4.90431
PPFIBP1	1.21	4.97337
PPP1CB	1.04	1.64042
PPP1R3D	1.15	3.04367
PPP2R1A	1.1	1.8703
PPP2R2A	1.37	1.55226
PPP2R5A	1.09	1.7919
PRICKLE1	1.66	5.96939
PRKACB	1.08	3.01896
PRNP	1.04	1.99579
PRPF18	1.31	1.72496
PRRG1	1.01	2.42812
PSAP	1.2	3.63965
PSME4	1.31	1.5618
PTGES	5.23	16.0415
PTPN2	2.16	3.99346
PTPN21	1.24	3.03967
PUM1	1.48	1.74727
QSOX1	1.78	5.39523
RAB27B	1.12	2.02128
RAB3D	1.09	2.63215
RAB40C	1.12	1.55032
RAP2C	1.1	3.17669
RASIP1	1.14	1.56867
RBBP4	1.1	1.51467
RBM15B	1.15	1.71858
RBM3	2.85	2.27935
RBPMS	1.75	4.99236
RGS2	1.57	193.952
RGS2	1.27	193.952
RIN1	1.19	1.62845
RIOK3	1.03	1.53941
RNF146	1.37	1.72736
RNF19B	5.84	2.6744
RPS6KL1	1.25	2.81453
RRAGA	1.17	1.42744
RRAS2	1.13	2.33138
RTF1	1.03	2.19577
RUSC2	1.26	1.83542
RYR2	1.47	18.2837
S100A10	1.44	12.3293
S100A11	1.02	4.08028
SALL2	1.2	2.23804
SAMM50	1.19	1.67356
SARS	1.49	1.47107
SCG2	1.93	54.976
SCG5	1.76	2.85774
SDC4	2.8	5.95616
SEH1L	1.7	1.65774
SERPINE1	2.11	12.5089
SERPING1	1.6	6.1856
SH3BGRL3	1.51	2.12066
SH3BP4	1.59	1.62221
SHBG	1.05	3.66328
SHF	1.1	1.93635
SLC20A1	1.01	2.2828
SLC25A29	1.05	3.63079
SLC31A2	1.26	3.65019
SLC35D2	1.02	2.649
SLC3A1	1.05	1.60114
SLC44A2	1.09	3.76284
SLC4A7	1.5	3.01544
SLMAP	1.5	5.01749
SMAD3	1.76	2.90404
SMARCE1	1.04	1.64843
SMS	1.66	3.40974
SMS	1.22	3.40974
SNN	1.12	3.70725
SNRPN	1.06	1.74111
SNX2	1.39	1.85228
SOCS2	1.08	1.6215
SPARC	1.05	3.93293
SPATS2L	1.65	1.73967
SPIRE1	1.1	2.04288
SPON2	1.74	3.14111
SPTBN1	1.3	1.88719
SPTLC2	1.24	1.81092
SRPX	1.11	4.85391
SSBP2	1.39	3.45487
ST13	1.19	3.49929
STK24	1.03	2.3723
STX12	1.6	2.71328
SULT1C2	1.15	1.3691
SWAP70	1.53	4.33588
TADA2A	1.18	1.60759
TBCE	1.09	1.76015
TBL1XR1	1.38	2.76228
TCF25	1.19	1.61608
TCP11L2	1.45	2.37578
TEAD4	1.02	2.05722
TFDP2	1.03	2.22703
TGFB1I1	2.15	4.1823
TGFB2	2.44	82.0841
TIPARP	5.59	4.63431
TLN1	1.36	1.8375
TMEFF1	1.04	3.53964
TMOD1	1.2	10.0209
TMSB4X	1.19	2.23969
TNC	1.48	60.5951
TNFRSF21	1.42	3.62048
TNIK	1.36	3.42113
TNPO2	1.02	1.55701
TOLLIP	1.22	1.37973
TOM1L1	1.88	2.71503
TOPORS	1.07	1.99549
TOR1AIP2	1.38	5.77461
TP53INP1	1.16	4.2979
TPM2	1.78	5.0146
TRIB1	1.27	27.6078
TRIM25	1.32	1.25458
TRIO	1.28	2.1826
TRPC3	1.17	4.00063
TSC22D1	1.74	2.64408
TSPAN7	1.87	1.85901
TTN	1.03	1.83423
TUBB2B	1.29	1.97703
TUBB2B	1.21	1.97703
UBE2E3	1.1	2.0587
UBE2H	1.58	3.38841
UBE2L6	1.28	2.58342
UBE2R2	1.2	1.57149
UBTD2	1.2	2.44702
UGP2	1.96	1.46229
USP18	1.21	1.49601
USP20	1.72	4.3333
USP32	1.12	4.16667
VAT1	1.45	7.18089
VCL	1.42	6.89444
VGLL4	1.42	4.25086
WARS2	1.51	1.20802
WASF1	2.67	16.9759
WDR1	1.32	1.73355
WDR44	1.31	4.50102
WDR47	1.11	1.52899
WWC2	1.27	3.93434
XAB2	1.42	1.27138
YPEL1	1.03	2.26917
YWHAG	1.16	2.5919
ZBTB38	1.06	4.44811
ZCCHC6	1.05	1.52388
ZFP36	3.74	4.20136
ZMAT5	1.04	1.53834
ZNF276	1.4	1.52073
ZNF281	1.18	2.00491
ZNF608	1.01	5.26801
ZYX	1.31	2.63664
