# Supplementary material for: Low Oxygen Levels Induce Early Luteinization Associated Changes in Bovine Granulosa Cells
Source: Front Physiol. 2018 Aug 7;9:1066. doi: 10.3389/fphys.2018.01066 (PMC6090175; doi:10.3389/fphys.2018.01066)
Supplement: HTML FILE S1 — Interactive heat map of differentially expressed genes. [file Presentation_2.ZIP]

Archive with 1 entries (1 files):
- supplementary html file.html
